# Supplementary material for: Lignans from Tujia Ethnomedicine Heilaohu: Chemical Characterization and Evaluation of Their Cytotoxicity and Antioxidant Activities
Source: MDPI journal article supplement (doi:10.3390/molecules23092147), 2018-08-27

# Lignans from Heilaohu: Chemical Characterization and Evaluation of their Cytotoxicity and Antioxidant Activities

Yongbei Liu<sup>1,†</sup>, Yupei Yang<sup>1,†</sup>, Shumaila Tasneem<sup>1</sup>, Nusrat Hussain<sup>1,4</sup>, Muhammad Daniyal<sup>1</sup>, Hanwen Yuan<sup>1</sup>, Qingling Xie<sup>1</sup>, Bin Liu<sup>2</sup>, Jing Sun<sup>3</sup>, Yuqing Jian<sup>1</sup>, Bin Li<sup>1</sup>, Shenghuang Chen<sup>1</sup> and Wei Wang<sup>1,3,4,\*</sup>

- <sup>1</sup> TCM and Ethnomedicine Innovation & Development International Laboratory, Innovative Drug Research Institute, School of Pharmacy, Hunan University of Chinese Medicine, Changsha, 410208, China; [ybliu2018@163.com](mailto:ybliu2018@163.com) (Y.L.); [yangyupei24@163.com](mailto:yangyupei24@163.com) (Y.Y.); [tasneemshum@gmail.com](mailto:tasneemshum@gmail.com) (S.T.); [nusrat\\_hussain42@yahoo.com](mailto:nusrat_hussain42@yahoo.com) (N.H.); [daniyaldani151@yahoo.com](mailto:daniyaldani151@yahoo.com) (M.D.); [hanwyuan@hotmail.com](mailto:hanwyuan@hotmail.com) (H. Y.); [XieQL1992@163.com](mailto:XieQL1992@163.com) (Q. X.); [cpujiyq2010@163.com](mailto:cpujiyq2010@163.com) (Y. J.); [libin\\_hucm@hotmail.com](mailto:libin_hucm@hotmail.com) (B.L.); [cshtyh@163.com](mailto:cshtyh@163.com) (S.C.)
- <sup>2</sup> College of Biology, Hunan Province Key Laboratory of Plant Functional Genomics and Developmental Regulation, Hunan University, Changsha 410082, China; [binliu2001@hotmail.com](mailto:binliu2001@hotmail.com)
- <sup>3</sup> Shaanxi Key Laboratory of Basic and New herbal Medicament Research, Shaanxi Collaborative Innovation Center of Chinese Medicinal Resource Industrialization, Shaanxi University of Chinese Medicine; [ph.175@163.com](mailto:ph.175@163.com)
- <sup>4</sup> H.E.J. Research Institute of Chemistry, International Center for Chemical and Biological Sciences, University of Karachi, Karachi-75270, Pakistan
- \* Correspondence: [wangwei402@hotmail.com](mailto:wangwei402@hotmail.com); Tel.: +86-136-5743-8606,
- <sup>†</sup> These authors contributed equally to this work.

## List of Figures

- Figure S1.** Structures of compounds **1-23** isolated from Heilaohu.
- Figure S2.**  $^1\text{H}$  NMR (600 MHz,  $\text{CDCl}_3$ ) spectrum of heilaohulignan A (**1**)
- Figure S3.**  $^{13}\text{C}$  NMR (150 MHz,  $\text{CDCl}_3$ ) spectrum of heilaohulignan A (**1**)
- Figure S4.**  $^1\text{H}$ - $^1\text{H}$  COSY NMR (600 MHz,  $\text{CDCl}_3$ ) spectrum of heilaohulignan A (**1**)
- Figure S5.** HSQC NMR (600 MHz,  $\text{CDCl}_3$ ) spectrum of heilaohulignanA (**1**)
- Figure S6.** HMBC NMR (600 MHz,  $\text{CDCl}_3$ ) spectrum of heilaohulignan A (**1**)
- Figure S7.** NOESY NMR (600 MHz,  $\text{CDCl}_3$ ) spectrum of heilaohulignan A (**1**)
- Figure S8.**  $^1\text{H}$  NMR (600 MHz,  $\text{CDCl}_3$ ) spectrum of heilaohulignan B (**2**)
- Figure S9.**  $^{13}\text{C}$  NMR (150 MHz,  $\text{CDCl}_3$ ) spectrum of heilaohulignanB (**2**)
- Figure S10.**  $^1\text{H}$ - $^1\text{H}$  COSY NMR (600 MHz,  $\text{CDCl}_3$ ) spectrum of heilaohulignan B (**2**)
- Figure S11.** HSQC NMR (600 MHz,  $\text{CDCl}_3$ ) spectrum of heilaohulignan B (**2**)
- Figure S12.** HMBC NMR (600 MHz,  $\text{CDCl}_3$ ) spectrum of heilaohulignan B (**2**)
- Figure S13.** ROESY NMR (600 MHz,  $\text{CDCl}_3$ ) spectrum of heilaohulignan B (**2**)
- Figure S14.**  $^1\text{H}$  NMR (600 MHz,  $\text{CDCl}_3$ ) spectrum of heilaohulignan C (**3**)
- Figure S15.**  $^{13}\text{C}$  NMR (150 MHz,  $\text{CDCl}_3$ ) spectrum of heilaohulignan C (**3**)
- Figure S16.**  $^1\text{H}$ - $^1\text{H}$  COSY NMR (600 MHz,  $\text{CDCl}_3$ ) spectrum of heilaohulignan C (**3**)
- Figure S17.** HSQC NMR (600 MHz,  $\text{CDCl}_3$ ) spectrum of heilaohulignan C (**3**)
- Figure S18.** HMBC NMR (600 MHz,  $\text{CDCl}_3$ ) spectrum of heilaohulignan C (**3**)
- Figure S19.** ROESY NMR (600 MHz,  $\text{CDCl}_3$ ) spectrum of heilaohulignan C (**3**)
- Figure S20.**  $^1\text{H}$  NMR (600 MHz,  $\text{CDCl}_3$ ) spectrum of schizandrin (**4**)
- Figure S21.**  $^{13}\text{C}$  NMR (150 MHz,  $\text{CDCl}_3$ ) spectrum of schizandrin (**4**)
- Figure S22.**  $^1\text{H}$  NMR (600 MHz,  $\text{CDCl}_3$ ) spectrum of binankadsurin A (**5**)
- Figure S23.**  $^{13}\text{C}$  NMR (150 MHz,  $\text{CDCl}_3$ ) spectrum of binankadsurin A (**5**)
- Figure S24.**  $^1\text{H}$  NMR (600 MHz,  $\text{CDCl}_3$ ) spectrum of acetylbinankadsurin A (**6**)
- Figure S25.**  $^{13}\text{C}$  NMR (150 MHz,  $\text{CDCl}_3$ ) spectrum of acetylbinankadsurin A (**6**)
- Figure S26.**  $^1\text{H}$  NMR (600 MHz, MeOD) spectrum of isobutyroylbinankadsurin A (**7**)
- Figure S27.**  $^{13}\text{C}$  NMR (150 MHz, MeOD) spectrum of isobutyroylbinankadsurin A (**7**)
- Figure S28.**  $^1\text{H}$  NMR (600 MHz,  $\text{CDCl}_3$ ) spectrum of isovaleroylbinankadsurin A (**8**)
- Figure S29.**  $^{13}\text{C}$  NMR (150 MHz,  $\text{CDCl}_3$ ) spectrum of isovaleroylbinankadsurin A (**8**)
- Figure S30.**  $^1\text{H}$  NMR (600 MHz,  $\text{CDCl}_3$ ) spectrum of kadsuralignan I (**9**)
- Figure S31.**  $^{13}\text{C}$  NMR (150 MHz,  $\text{CDCl}_3$ ) spectrum of kadsuralignan I (**9**)
- Figure S32.**  $^1\text{H}$  NMR (600 MHz,  $\text{CDCl}_3$ ) spectrum of kadsuralignan J (**10**)
- Figure S33.**  $^{13}\text{C}$  NMR (150 MHz,  $\text{CDCl}_3$ ) spectrum of kadsuralignan J (**10**)
- Figure S34.**  $^1\text{H}$  NMR (600 MHz,  $\text{CDCl}_3$ ) spectrum of kadsuralignan L (**11**)
- Figure S35.**  $^{13}\text{C}$  NMR (150 MHz,  $\text{CDCl}_3$ ) spectrum of kadsuralignan L (**11**)
- Figure S36.**  $^1\text{H}$  NMR (600 MHz,  $\text{CDCl}_3$ ) spectrum of kadsulignan N (**12**)
- Figure S37.**  $^{13}\text{C}$  NMR (150 MHz,  $\text{CDCl}_3$ ) spectrum of kadsulignan N (**12**)
- Figure S38.**  $^1\text{H}$  NMR (600 MHz,  $\text{CDCl}_3$ ) spectrum of longipedunin B (**13**)
- Figure S39.**  $^{13}\text{C}$  NMR (150 MHz,  $\text{CDCl}_3$ ) spectrum of longipedunin B (**13**)
- Figure S40.**  $^1\text{H}$  NMR (600 MHz,  $\text{CDCl}_3$ ) spectrum of schisantherin F (**14**)
- Figure S41.**  $^{13}\text{C}$  NMR (150 MHz,  $\text{CDCl}_3$ ) spectrum of schisantherin F (**14**)
- Figure S42.**  $^1\text{H}$  NMR (600 MHz, MeOD) spectrum of schizanrin D (**15**)

**Figure S43.**  $^{13}\text{C}$  NMR (150 MHz, MeOD) spectrum of schizanrin D (15)

**Figure S44.**  $^1\text{H}$  NMR (600 MHz, MeOD) spectrum of acetylgomisin R (16)

**Figure S45.**  $^{13}\text{C}$  NMR (150 MHz, MeOD) spectrum of acetylgomisin R (16)

**Figure S46.**  $^1\text{H}$  NMR (600 MHz,  $\text{CDCl}_3$ ) spectrum of intermedin A (17)

**Figure S47.**  $^{13}\text{C}$  NMR (150 MHz,  $\text{CDCl}_3$ ) spectrum of intermedin A (17)

**Figure S48.**  $^1\text{H}$  NMR (600 MHz,  $\text{CDCl}_3$ ) spectrum of kadsurarin (18)

**Figure S49.**  $^{13}\text{C}$  NMR (150 MHz,  $\text{CDCl}_3$ ) spectrum of kadsurarin (18)

**Figure S50.**  $^1\text{H}$  NMR (600 MHz,  $\text{CDCl}_3$ ) spectrum of kadsutherin A (19)

**Figure S51.**  $^{13}\text{C}$  NMR (150 MHz,  $\text{CDCl}_3$ ) spectrum of kadsutherin A (19)

**Figure S52.**  $^1\text{H}$  NMR (600 MHz,  $\text{CDCl}_3$ ) spectrum of kadsuphilol A (20)

**Figure S53.**  $^{13}\text{C}$  NMR (150 MHz,  $\text{CDCl}_3$ ) spectrum of kadsuphilol A (20)

**Figure S54.**  $^1\text{H}$  NMR (600 MHz,  $\text{CDCl}_3$ ) spectrum of meso-dihydroguaiaretic acid dimethyl (21)

**Figure S55.**  $^{13}\text{C}$  NMR (150 MHz,  $\text{CDCl}_3$ ) spectrum of meso-dihydroguaiaretic acid dimethyl (21)

**Figure S56.**  $^1\text{H}$  NMR (600 MHz,  $\text{CDCl}_3$ ) spectrum of schiarianrin E (22)

**Figure S57.**  $^{13}\text{C}$  NMR (150 MHz,  $\text{CDCl}_3$ ) spectrum of schiarianrin E (22)

**Figure S58.**  $^1\text{H}$  NMR (600 MHz,  $\text{CDCl}_3$ ) spectrum of schiarisanrin A (23)

**Figure S59.**  $^{13}\text{C}$  NMR (150 MHz,  $\text{CDCl}_3$ ) spectrum of schiarisanrin A (23)

**Figure S60.** HRESIMS spectrum of heilaohulignan A (1)

**Figure S61.** HRESIMS spectrum of heilaohulignan B (2)

**Figure S62.** HRESIMS spectrum of heilaohulignan C (3)

**Figure S63.** CD spectrum of heilaohulignan A (1)

**Figure S64.** CD spectrum of heilaohulignan B (2)

**Figure S65.** CD spectrum of heilaohulignan C (3)

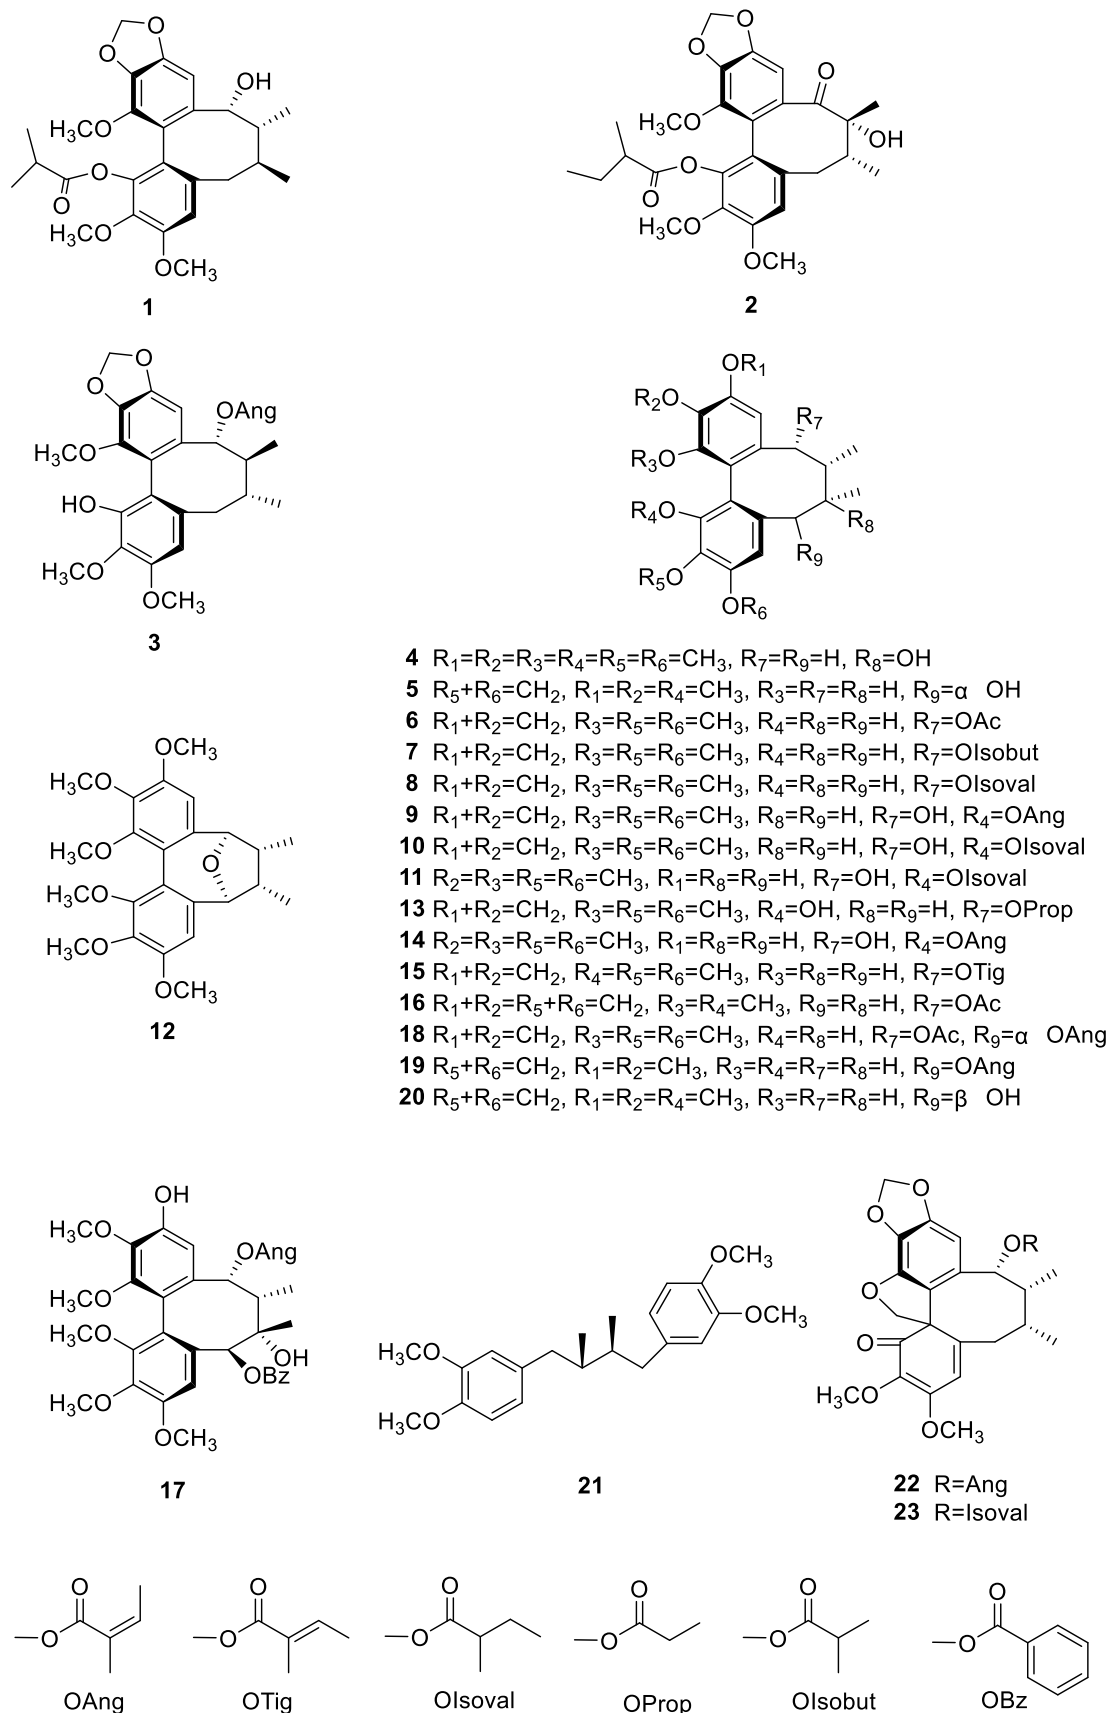

**Figure S1.** Structures of compounds 1-23 isolated from Heilaohu.

**Figure S2.**  $^1\text{H}$  NMR (600 MHz,  $\text{CDCl}_3$ ) spectrum of heilaohulignan A (**1**)

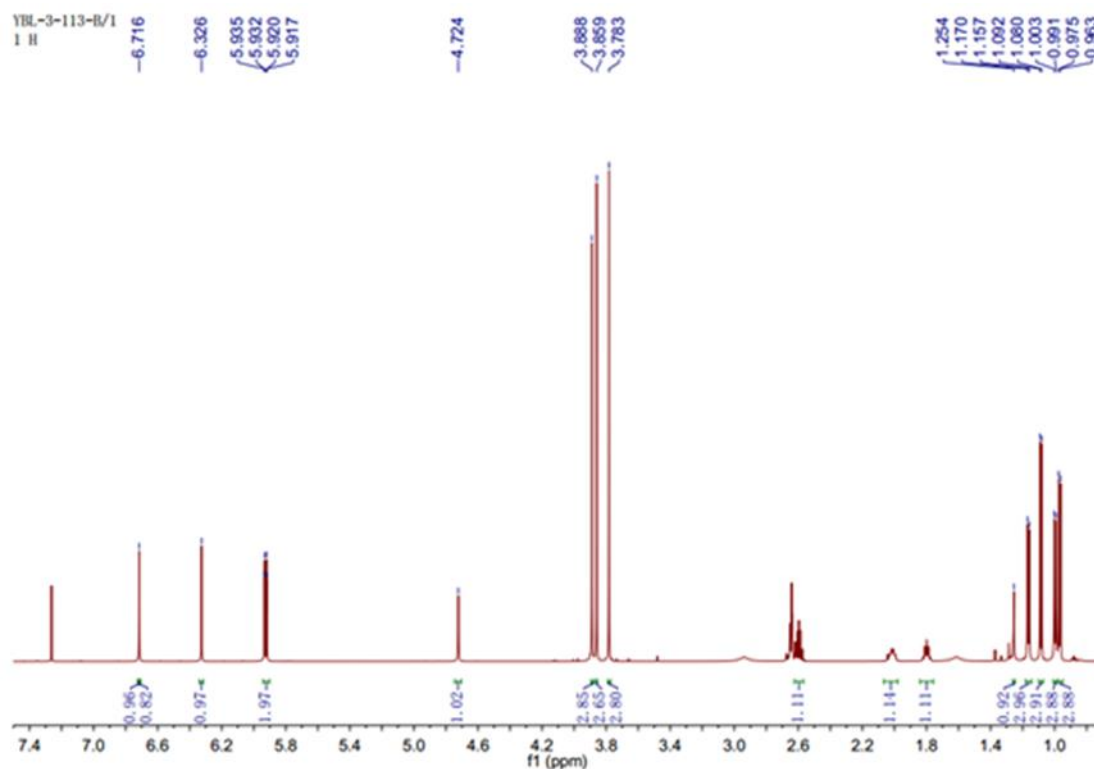

**Figure S3.**  $^{13}\text{C}$  NMR (150 MHz,  $\text{CDCl}_3$ ) spectrum of heilaohulignan A (**1**)

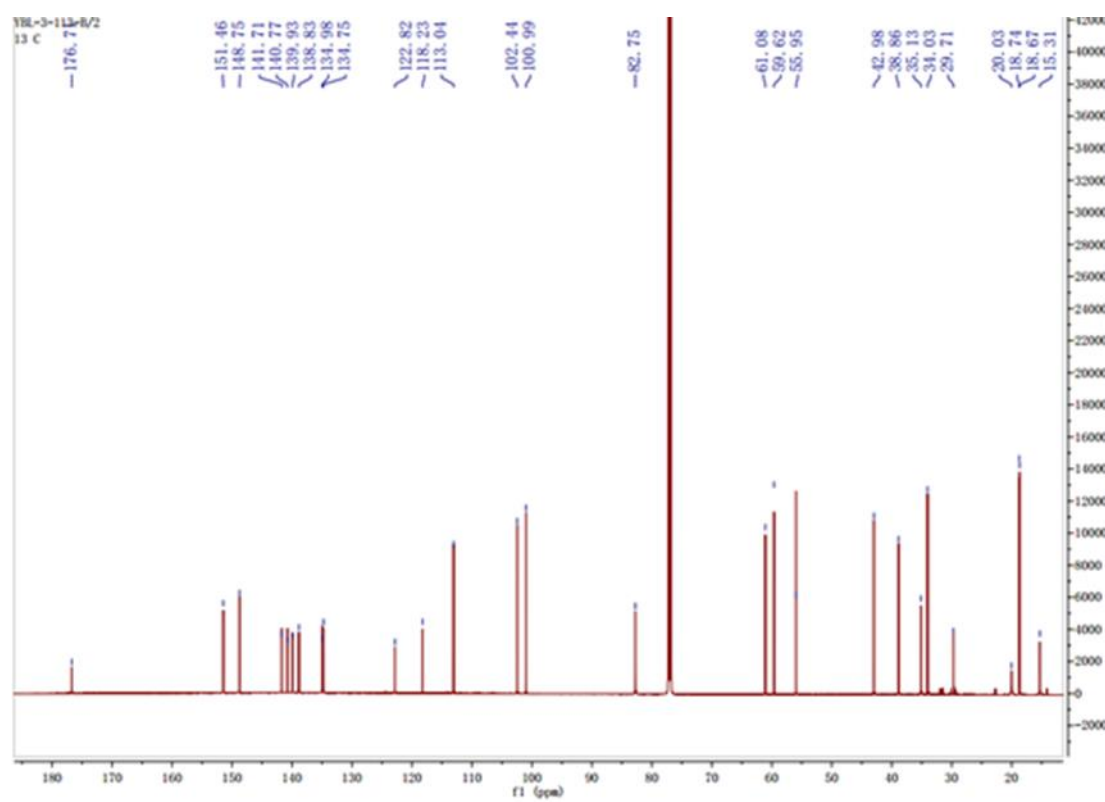

**Figure S4.**  $^1\text{H}$ - $^1\text{H}$  COSY NMR (600 MHz,  $\text{CDCl}_3$ ) spectrum of heilaohulignan A (**1**)

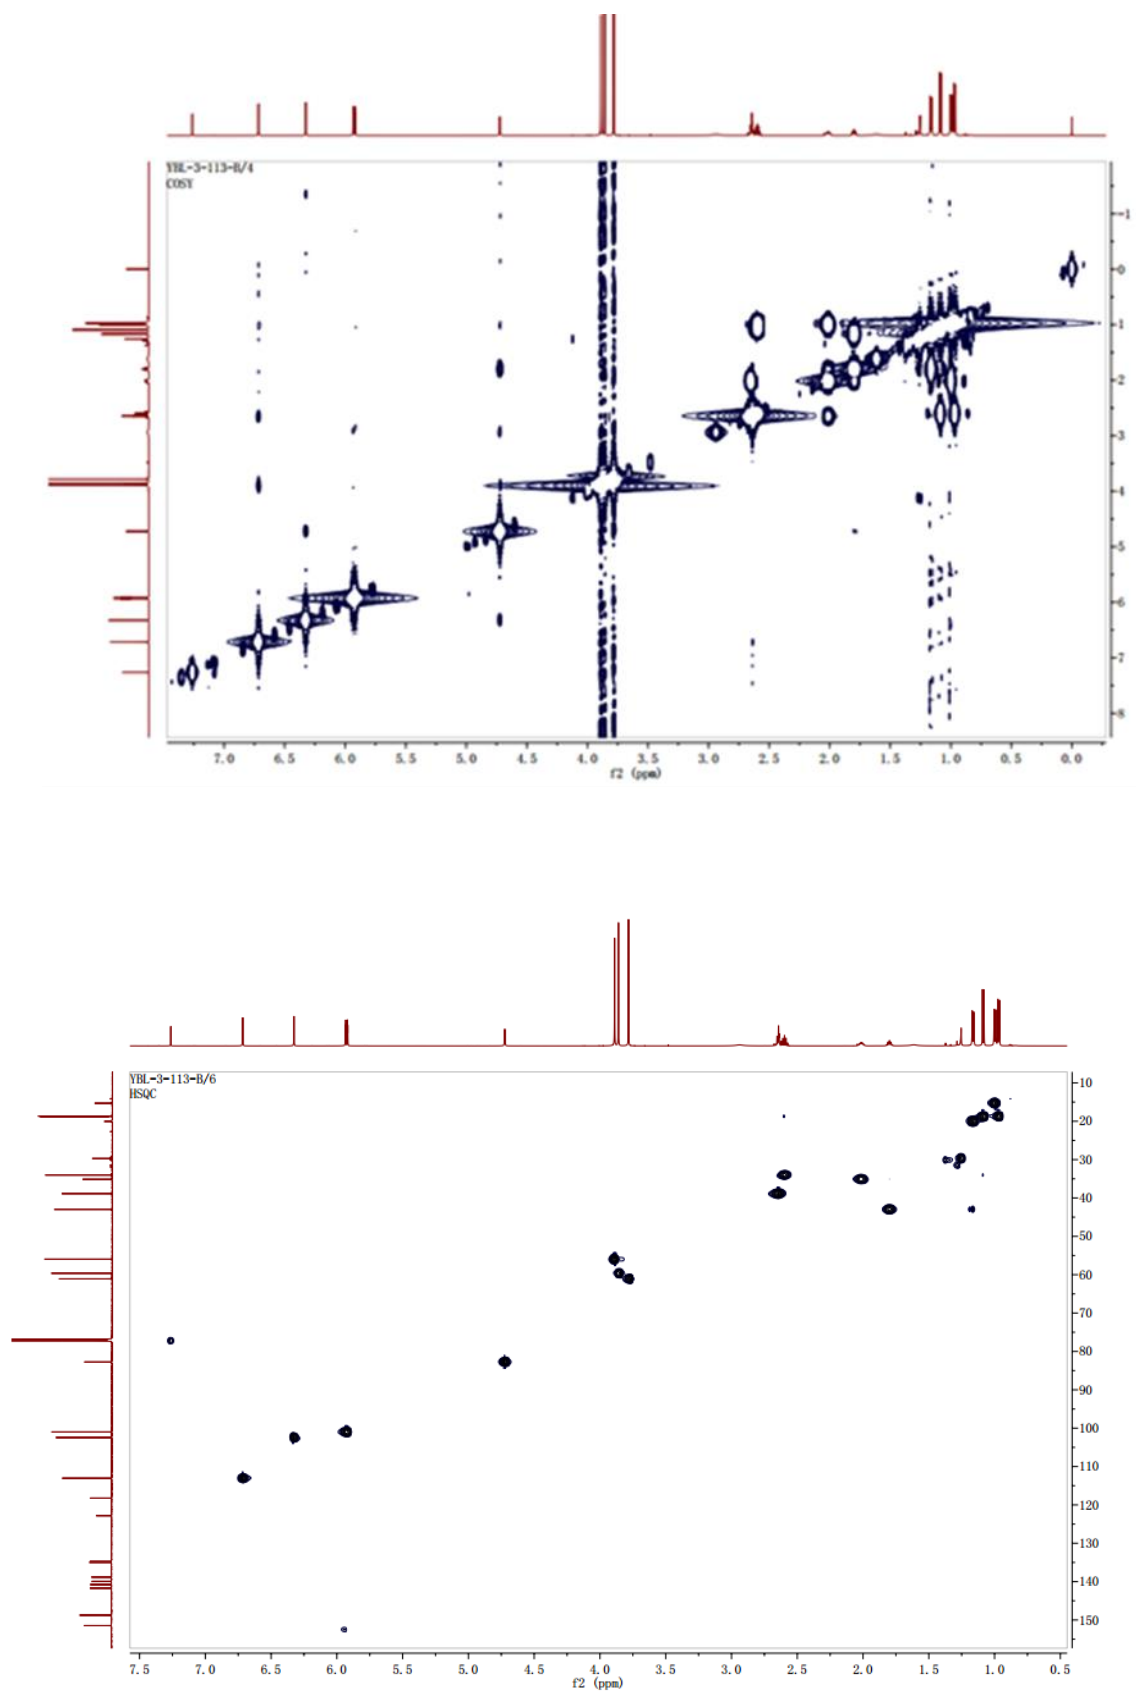

**Figure S5.** HSQC NMR (600 MHz, CDCl<sub>3</sub>) spectrum of heilaohulignan A (1)

**Figure S6.** HMBC NMR (600 MHz, CDCl<sub>3</sub>) spectrum of heilaohulignan A (1)

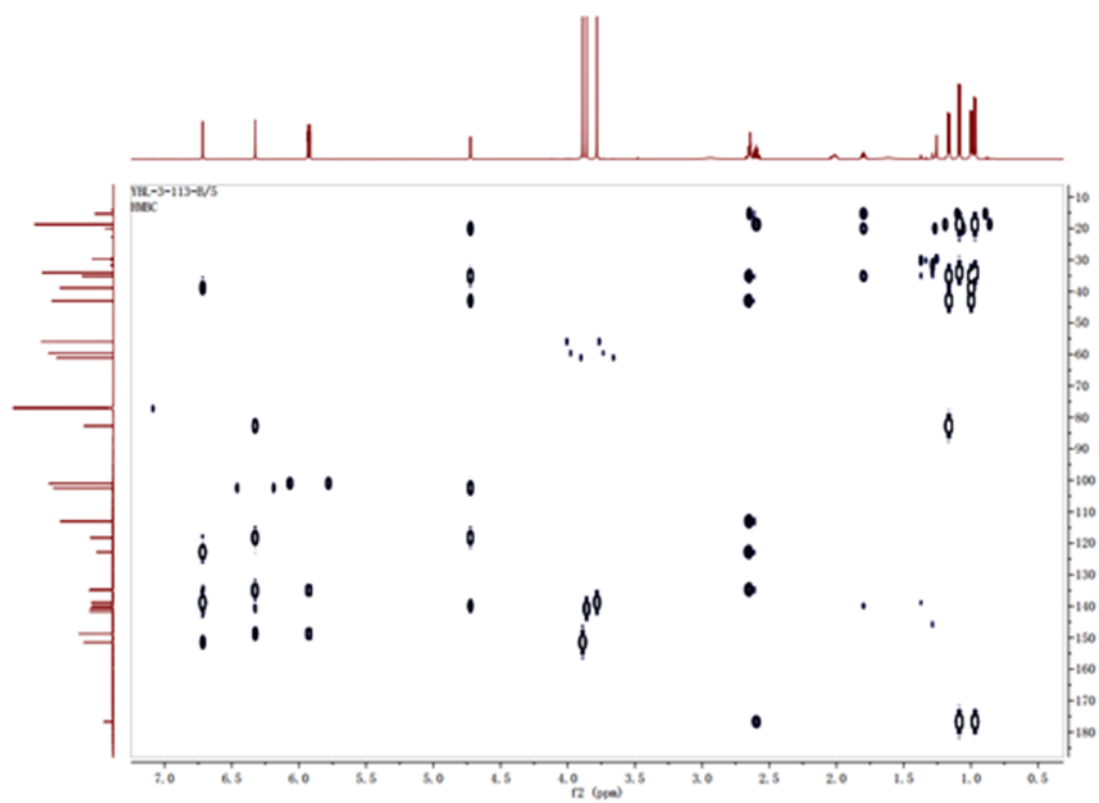

**Figure S7.** NOESY NMR (600 MHz, CDCl<sub>3</sub>) spectrum of heilaohulignan A (1)

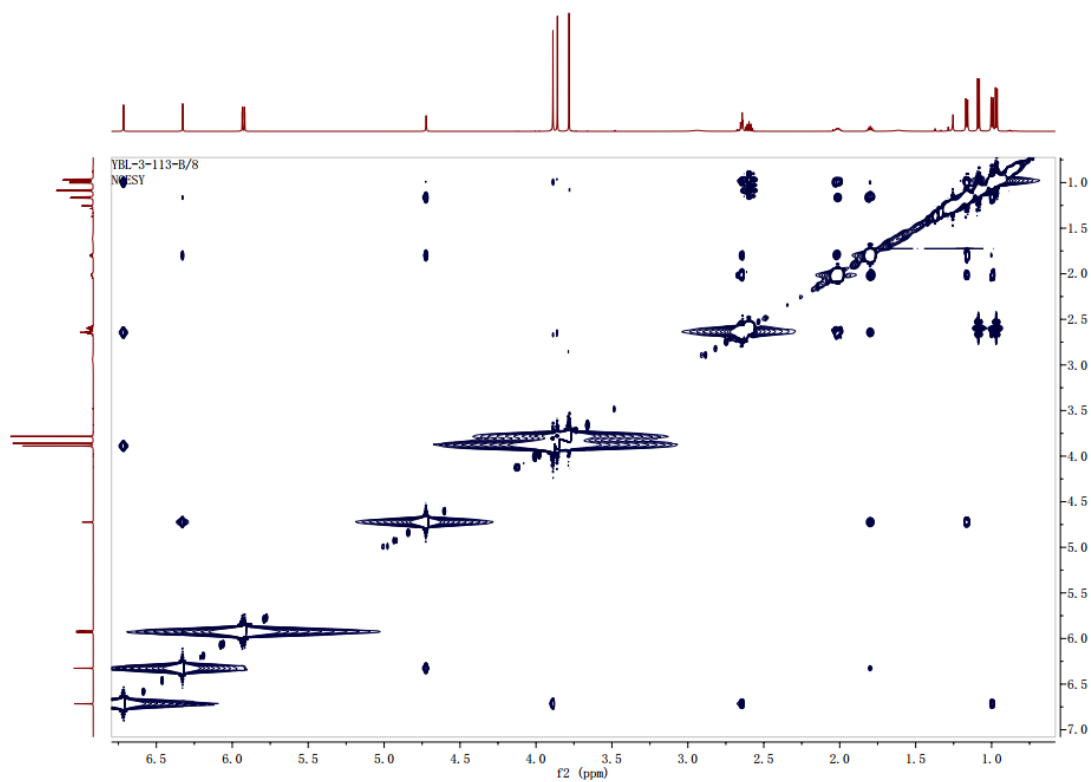

**Figure S8.** <sup>1</sup>H NMR (600 MHz, CDCl<sub>3</sub>) spectrum of heilaohulignan B (2)

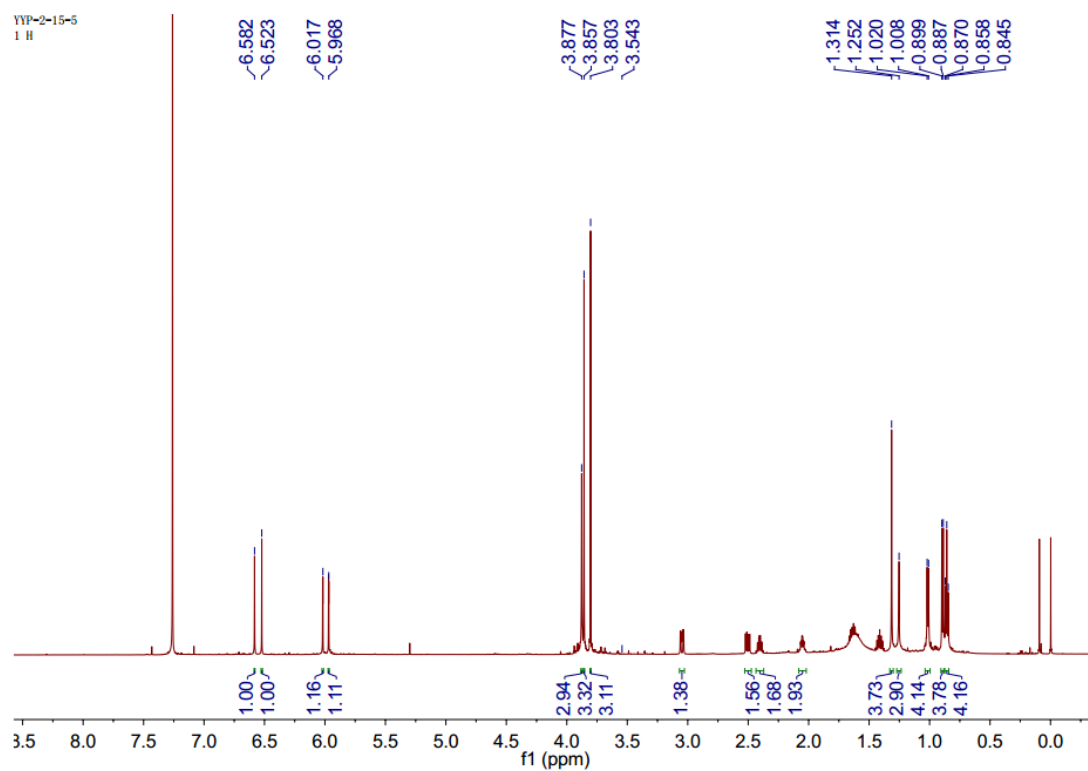

**Figure S9.**  $^{13}\text{C}$  NMR (150 MHz,  $\text{CDCl}_3$ ) spectrum of heilaohulignan B (2)

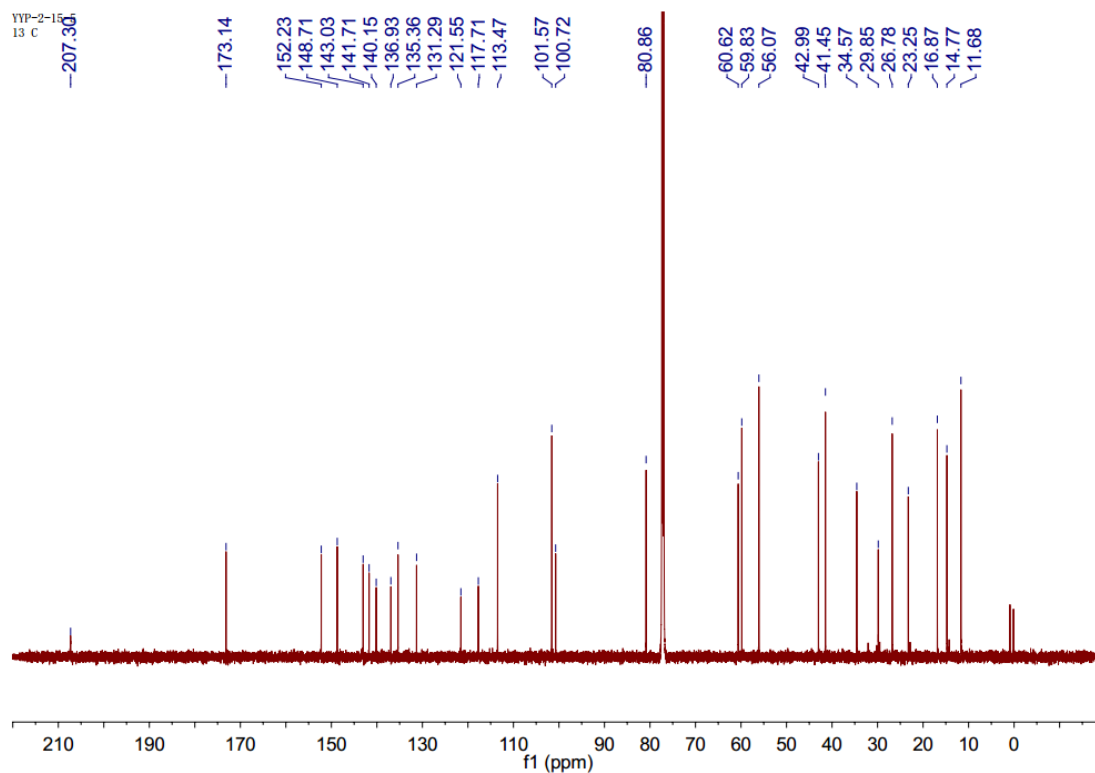

**Figure S10.**  $^1\text{H}$ - $^1\text{H}$  COSY NMR (600 MHz,  $\text{CDCl}_3$ ) spectrum of heilaohulignan B (2)



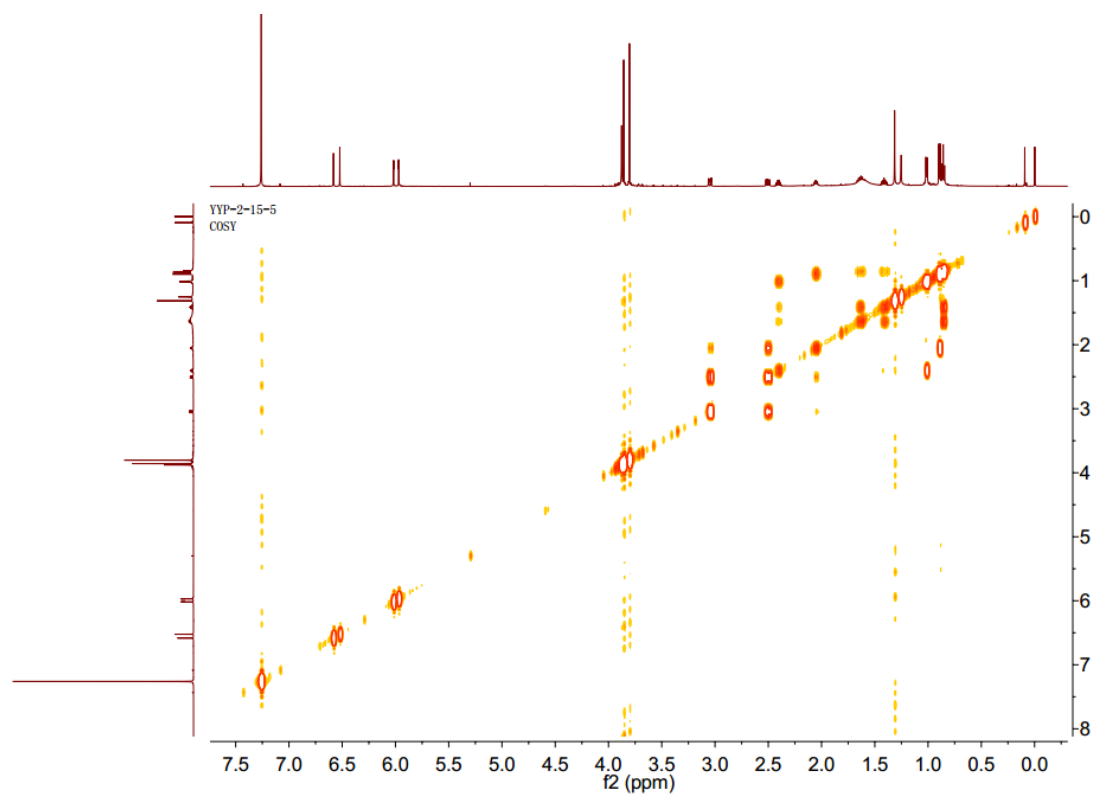

**Figure S11.** HSQC NMR (600 MHz,  $\text{CDCl}_3$ ) spectrum of heilaohulignan B (2)

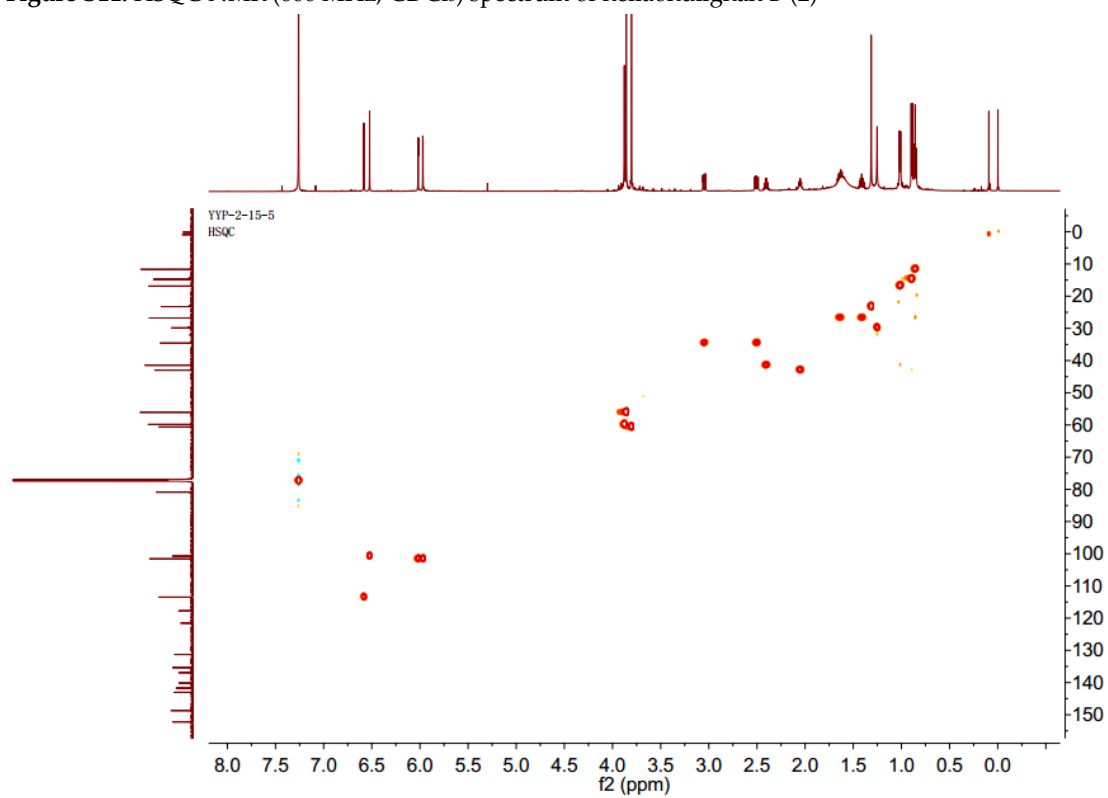

**Figure S12.** HMBC NMR (600 MHz,  $\text{CDCl}_3$ ) spectrum of heilaohulignan B (2)

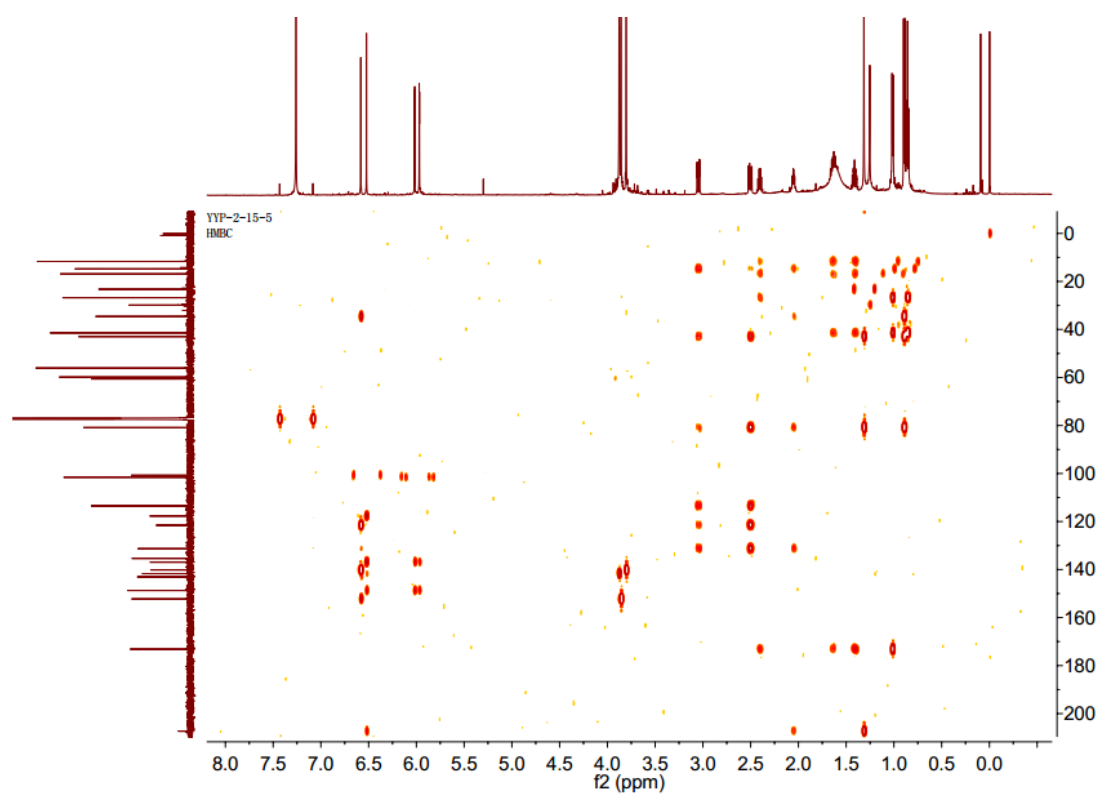

Figure S13. ROESY NMR (600 MHz,  $\text{CDCl}_3$ ) spectrum of heilaohulignan B (2)

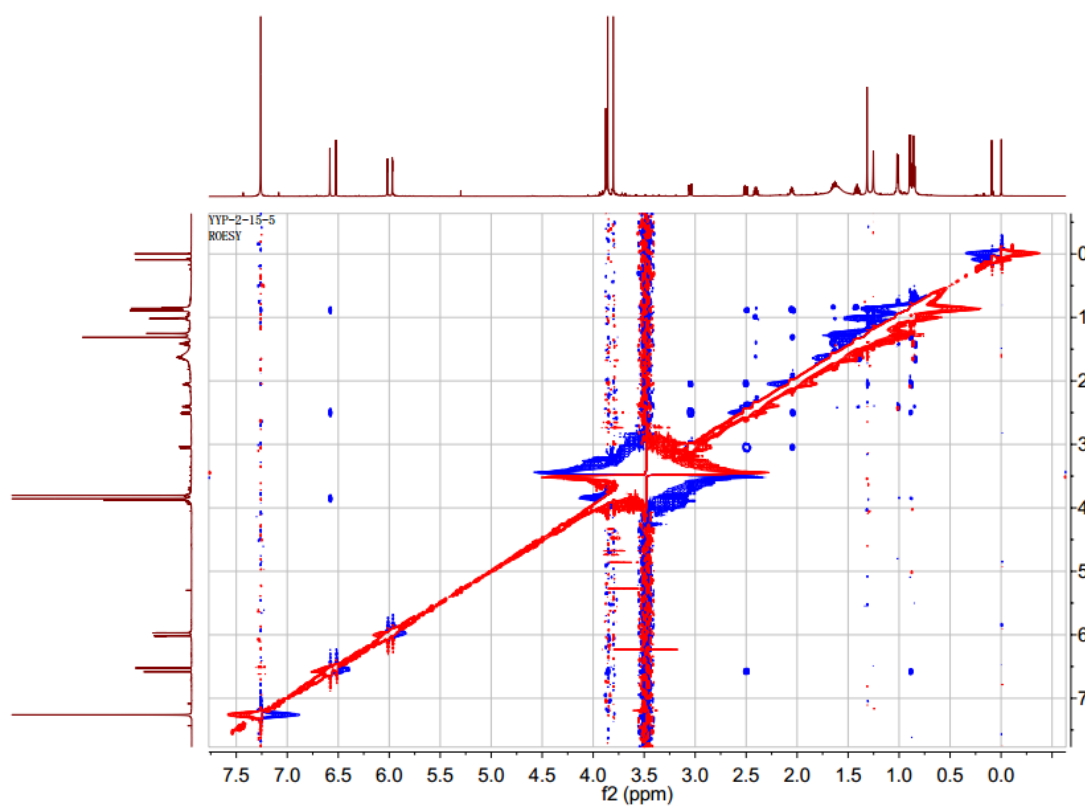

Figure S14.  $^1\text{H}$  NMR (600 MHz,  $\text{CDCl}_3$ ) spectrum of heilaohulignan C (3)

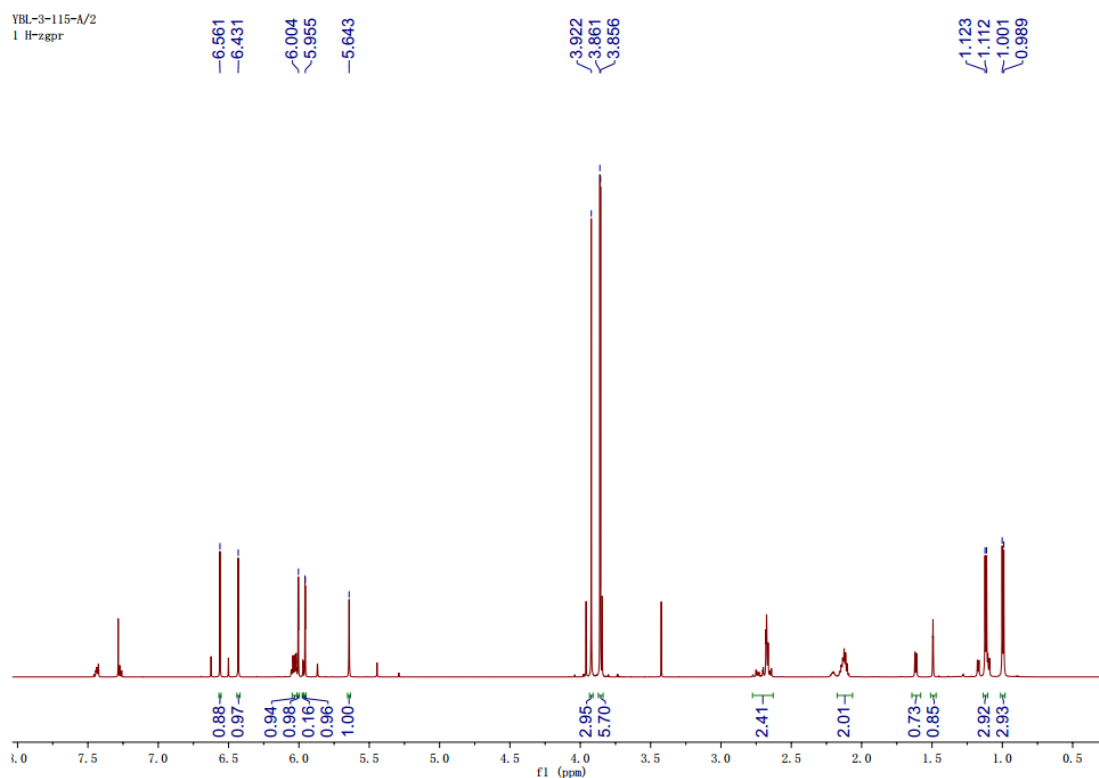

**Figure S15.**  $^{13}\text{C}$  NMR (150 MHz,  $\text{CDCl}_3$ ) spectrum of heilaohulignan C (**3**)

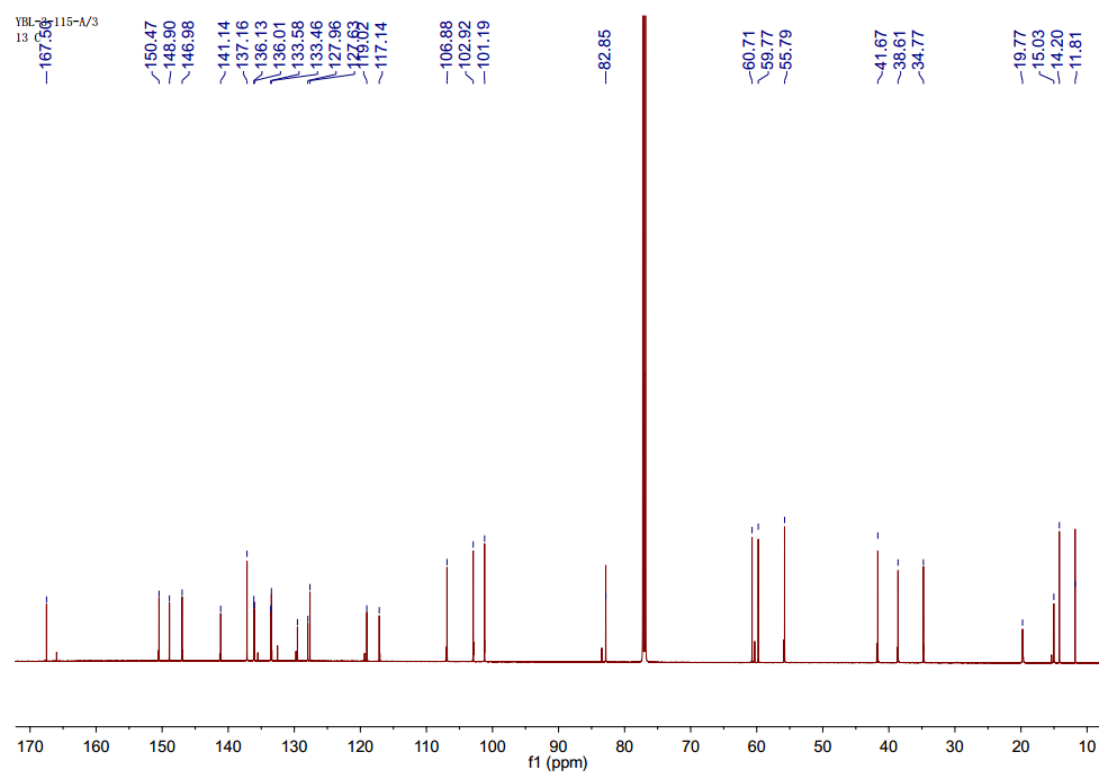

**Figure S16.**  $^1\text{H}$ - $^1\text{H}$  COSY NMR (600 MHz,  $\text{CDCl}_3$ ) spectrum of heilaohulignan C (**3**)

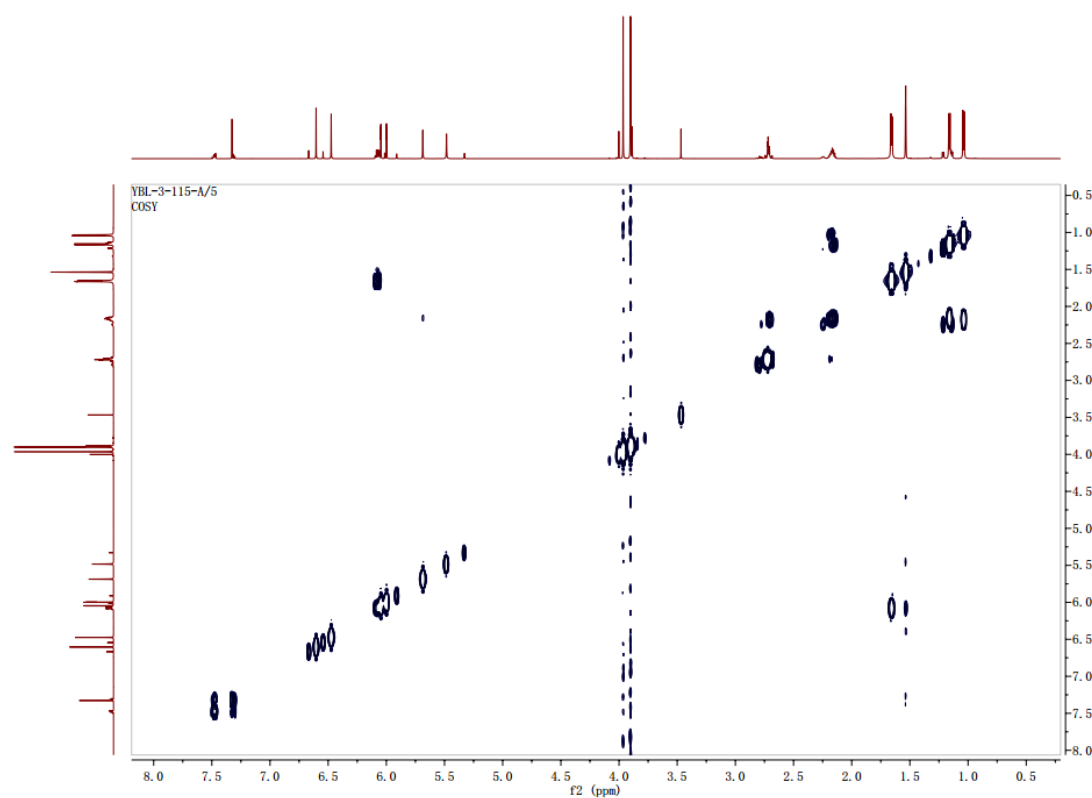

**Figure S17.** HSQC NMR (600 MHz, CDCl<sub>3</sub>) spectrum of heilaohulignan C (3)

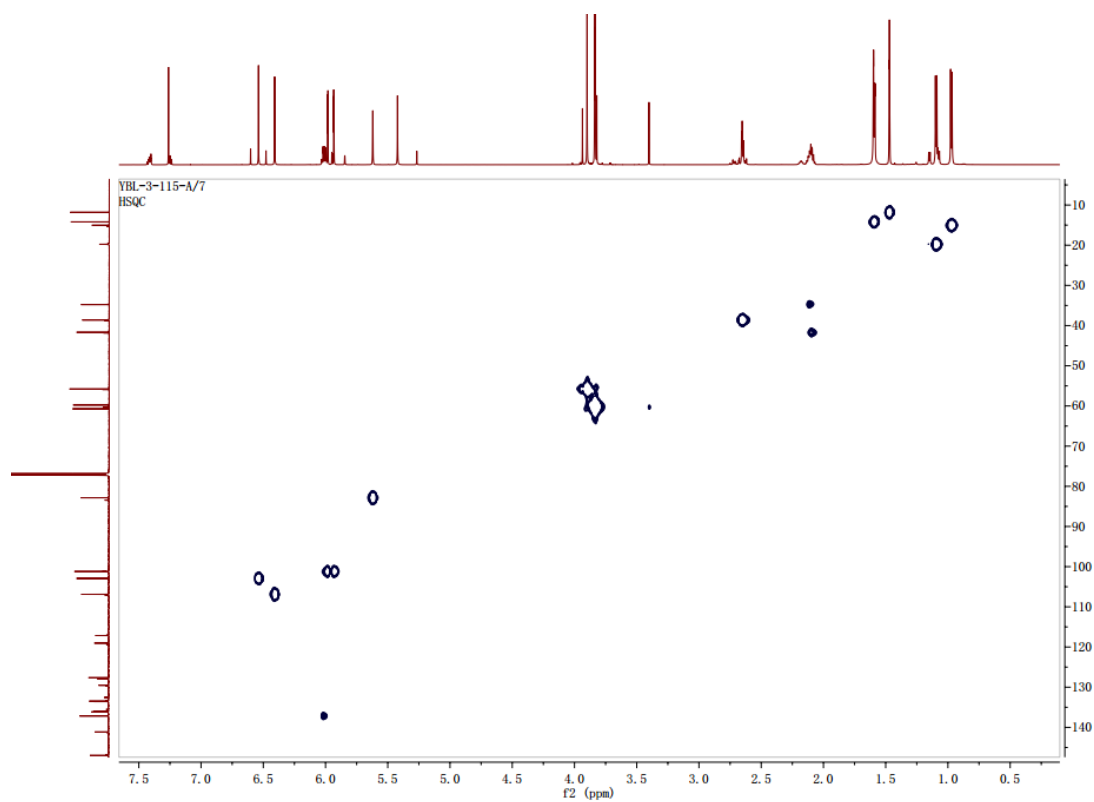

**Figure S18.** HMBC NMR (600 MHz, CDCl<sub>3</sub>) spectrum of heilaohulignan C (3)

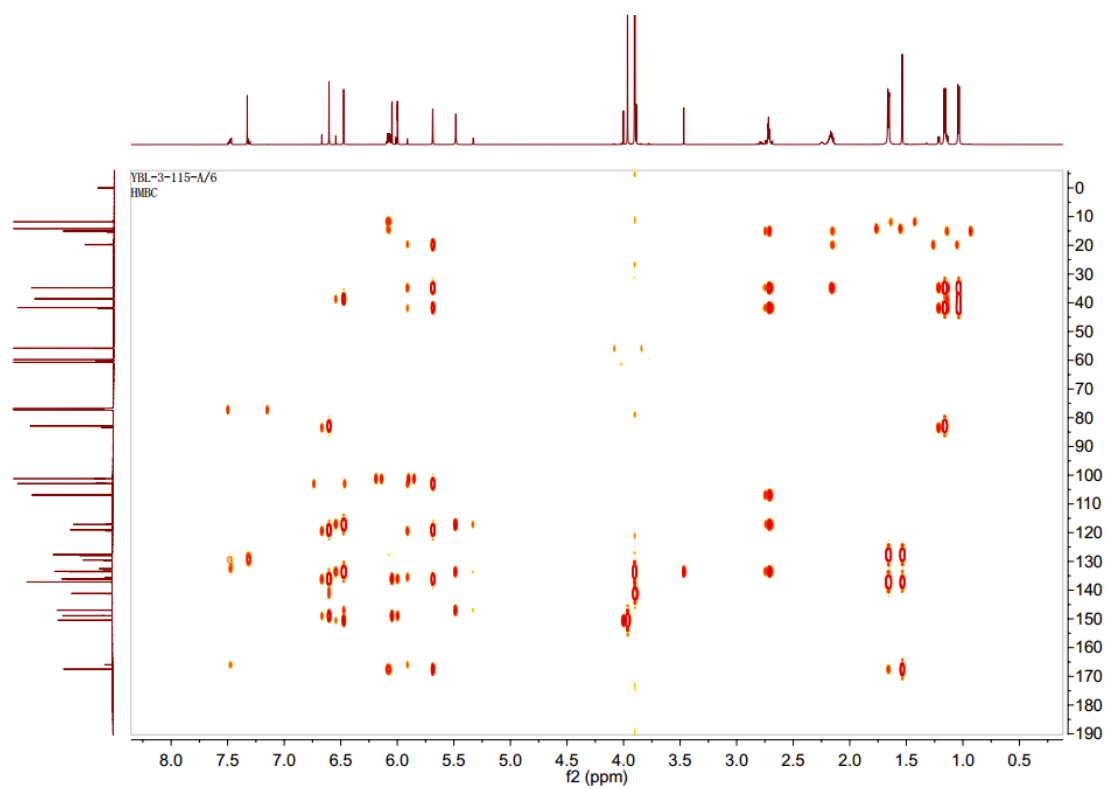

**Figure S19.** ROESY NMR (600 MHz, CDCl<sub>3</sub>) spectrum of heilaohulignan C (**3**)

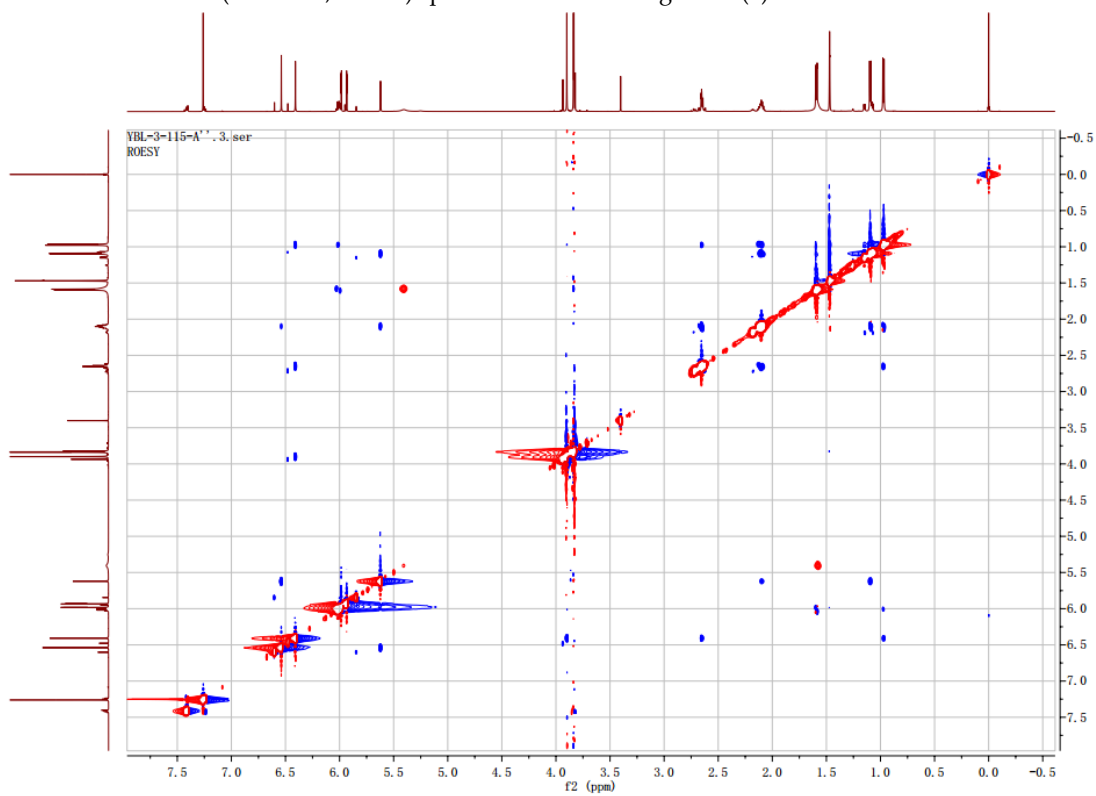

**Figure S20.**  $^1\text{H}$  NMR (600 MHz,  $\text{CDCl}_3$ ) spectrum of schizandrin (**4**)

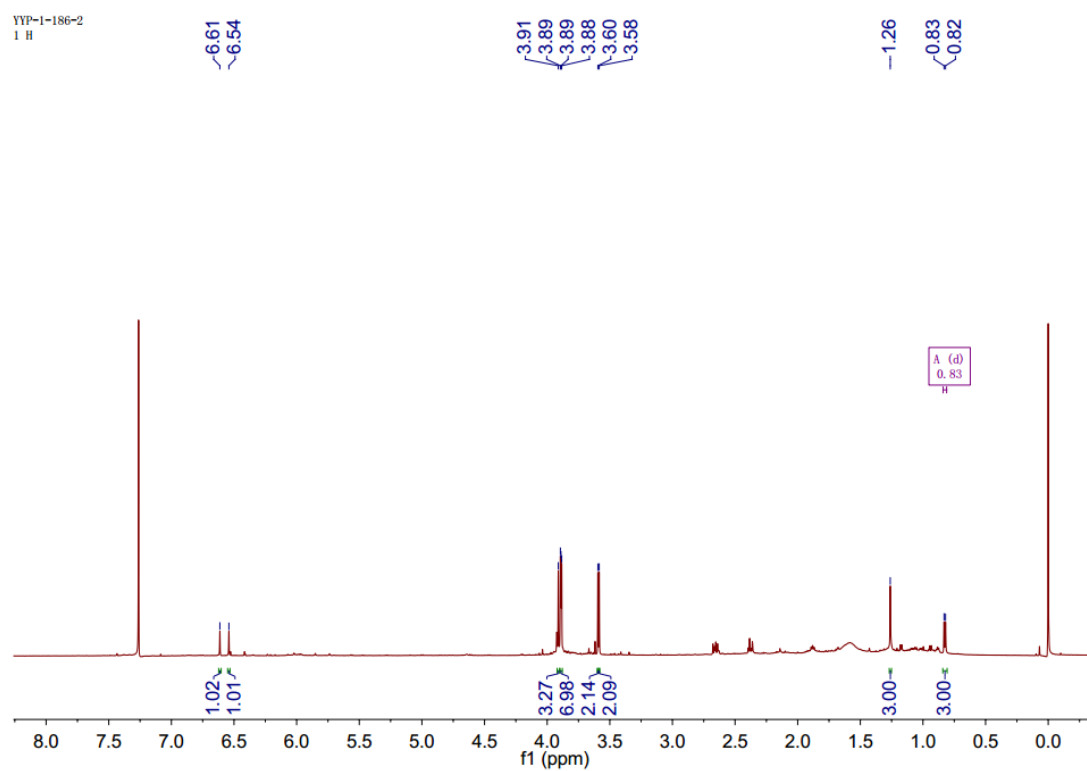

**Figure S21.**  $^{13}\text{C}$  NMR (150 MHz,  $\text{CDCl}_3$ ) spectrum of schizandrin (**4**)

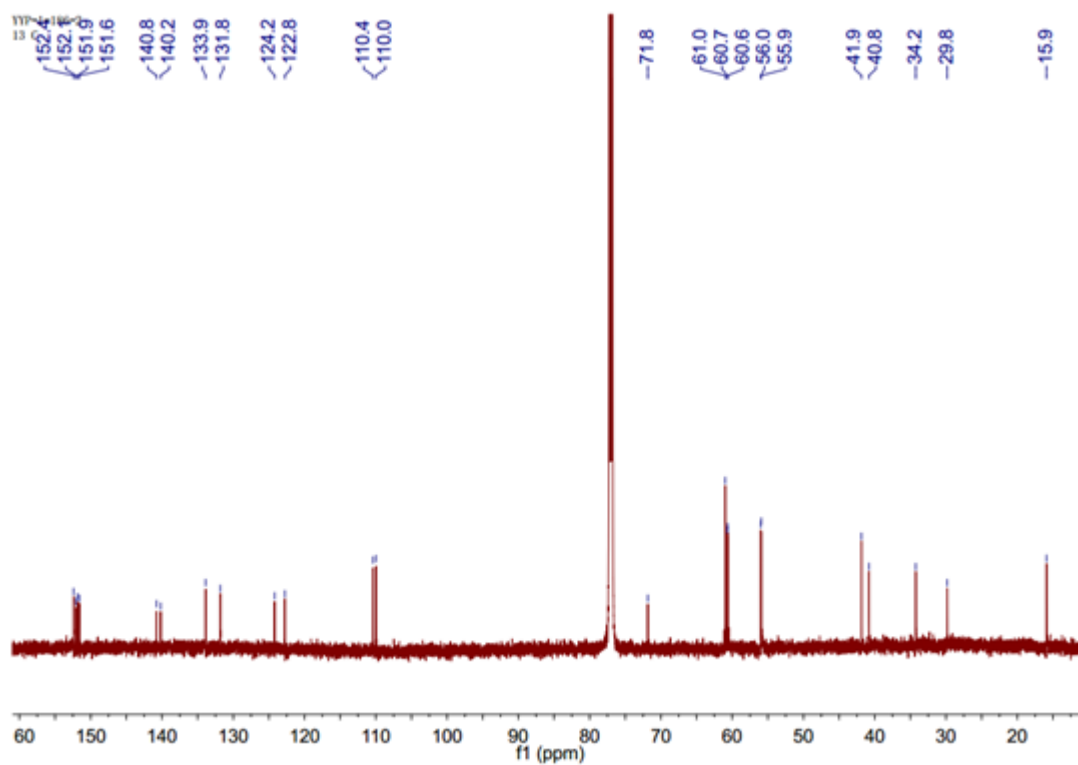

**Figure S22.**  $^1\text{H}$  NMR (600 MHz,  $\text{CDCl}_3$ ) spectrum of binankadsurin A (**5**)

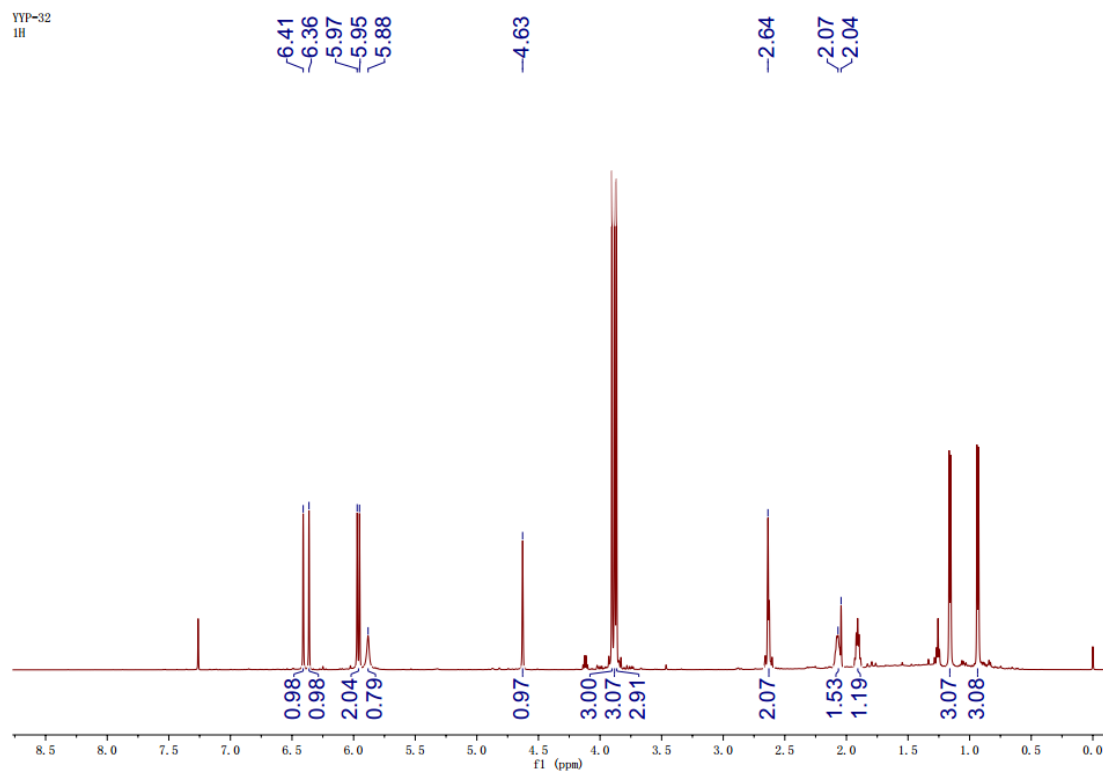

**Figure S23.**  $^{13}\text{C}$  NMR (150 MHz,  $\text{CDCl}_3$ ) spectrum of binankadsurin A (5)

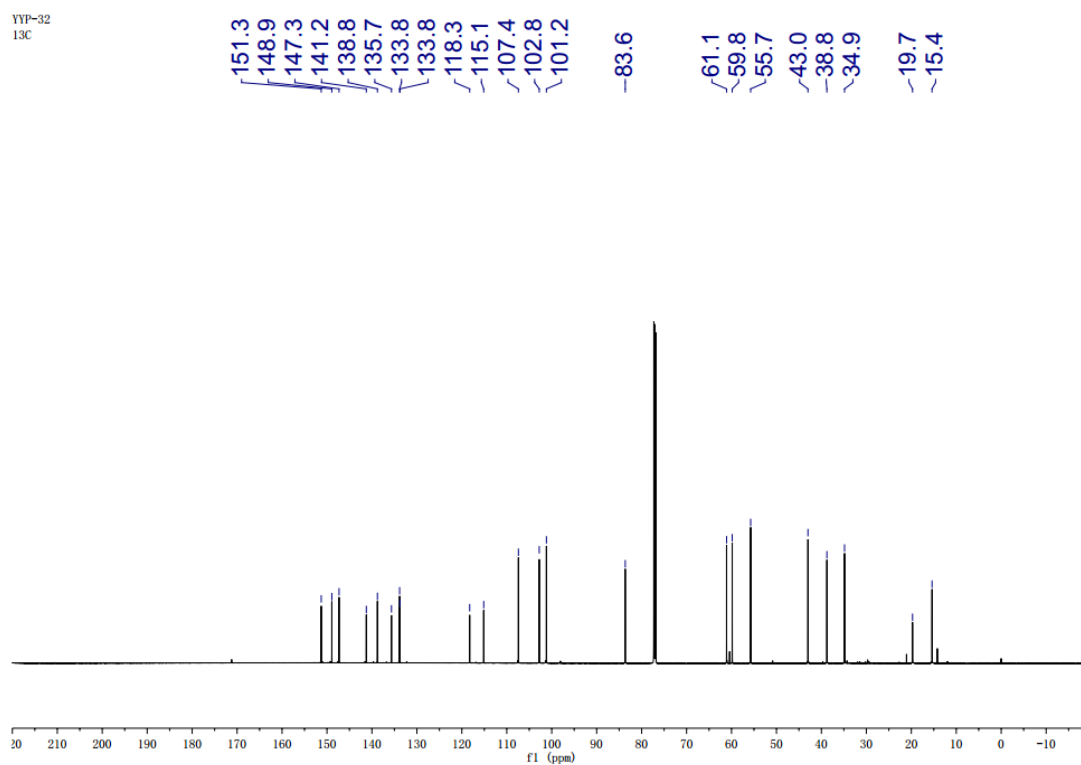

**Figure S24.**  $^1\text{H}$  NMR (600 MHz,  $\text{CDCl}_3$ ) spectrum of acetylbinankadsurin A (6)

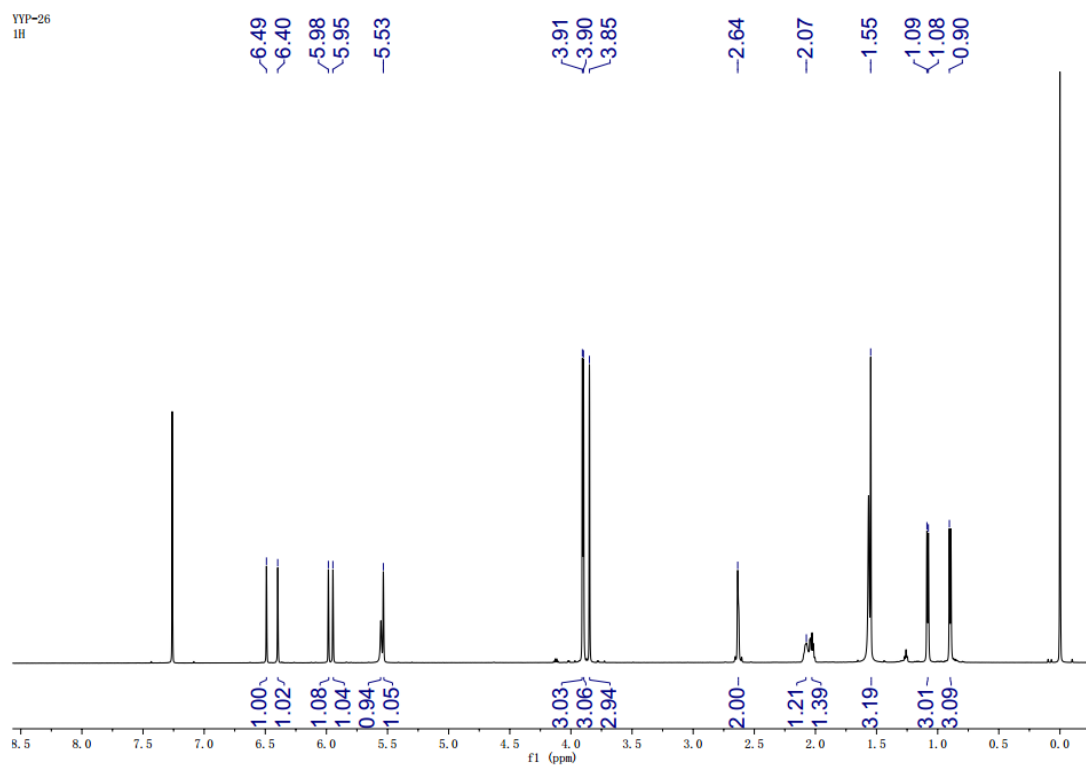

**Figure S25.**  $^{13}\text{C}$  NMR (150 MHz,  $\text{CDCl}_3$ ) spectrum of acetylbinankadsurin A (6)

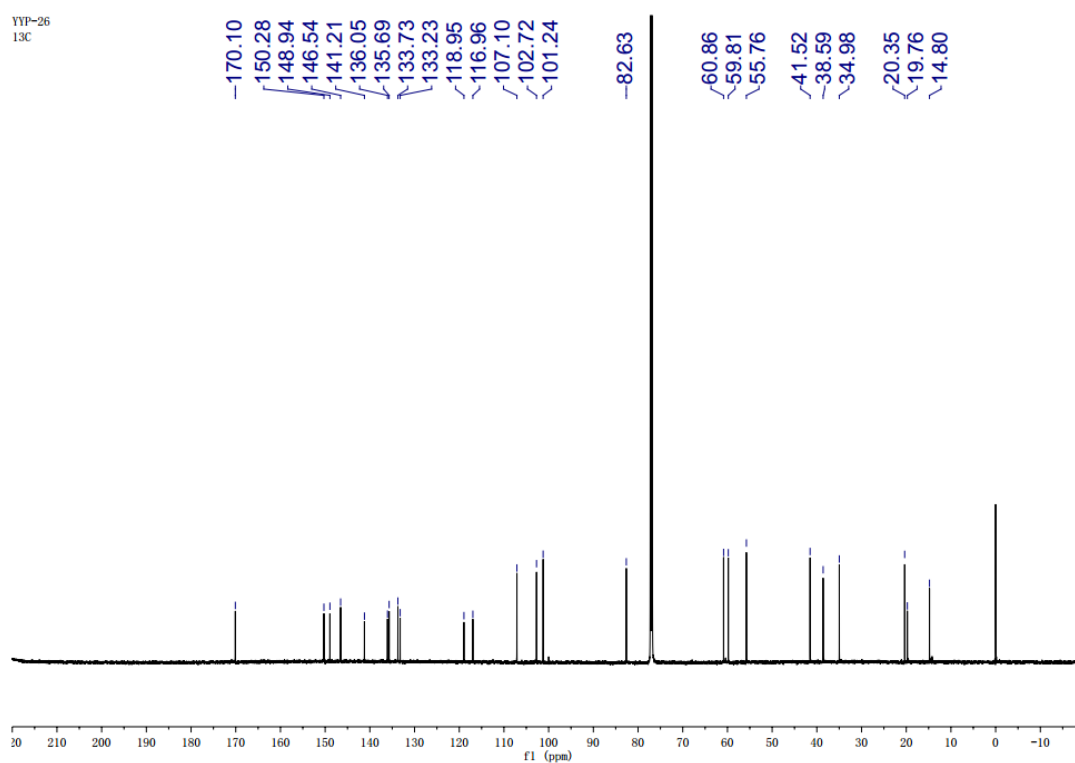

**Figure S26.**  $^1\text{H}$  NMR (600 MHz, MeOD) spectrum of isobutyroylbinankadsurin A (7)



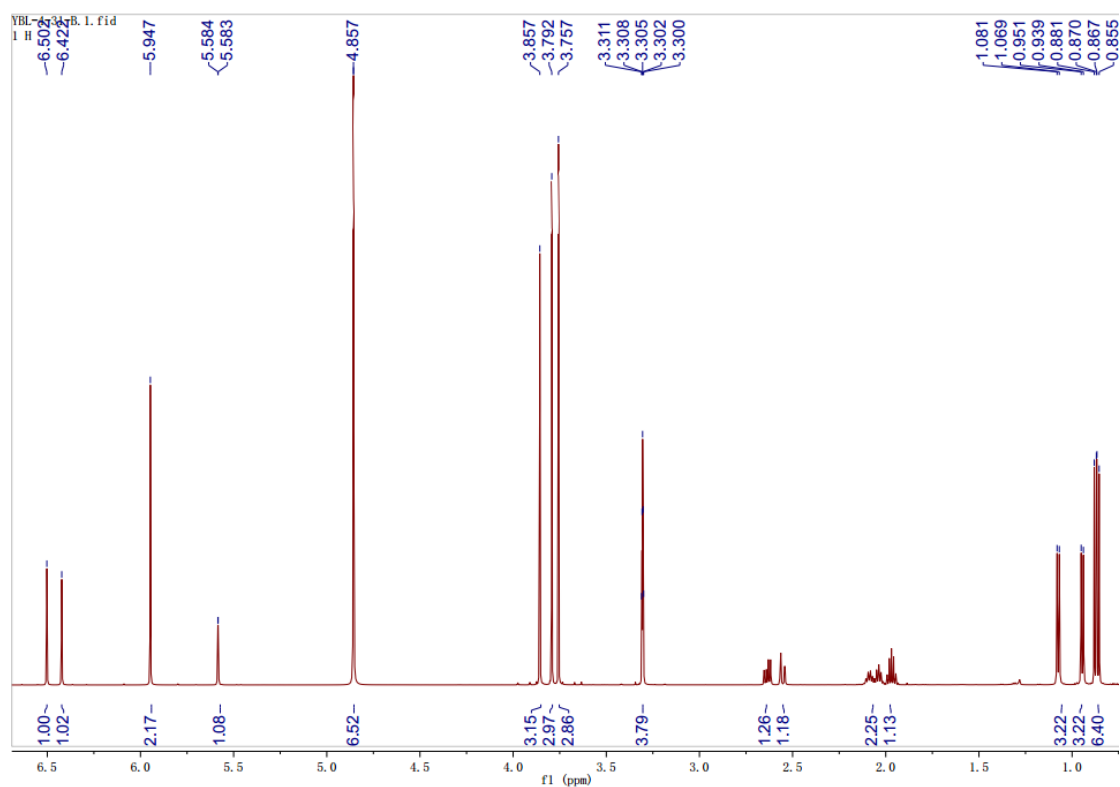

**Figure S27.** <sup>13</sup>C NMR (150 MHz, MeOD) spectrum of isobutyroylbinankadsurin A (7)

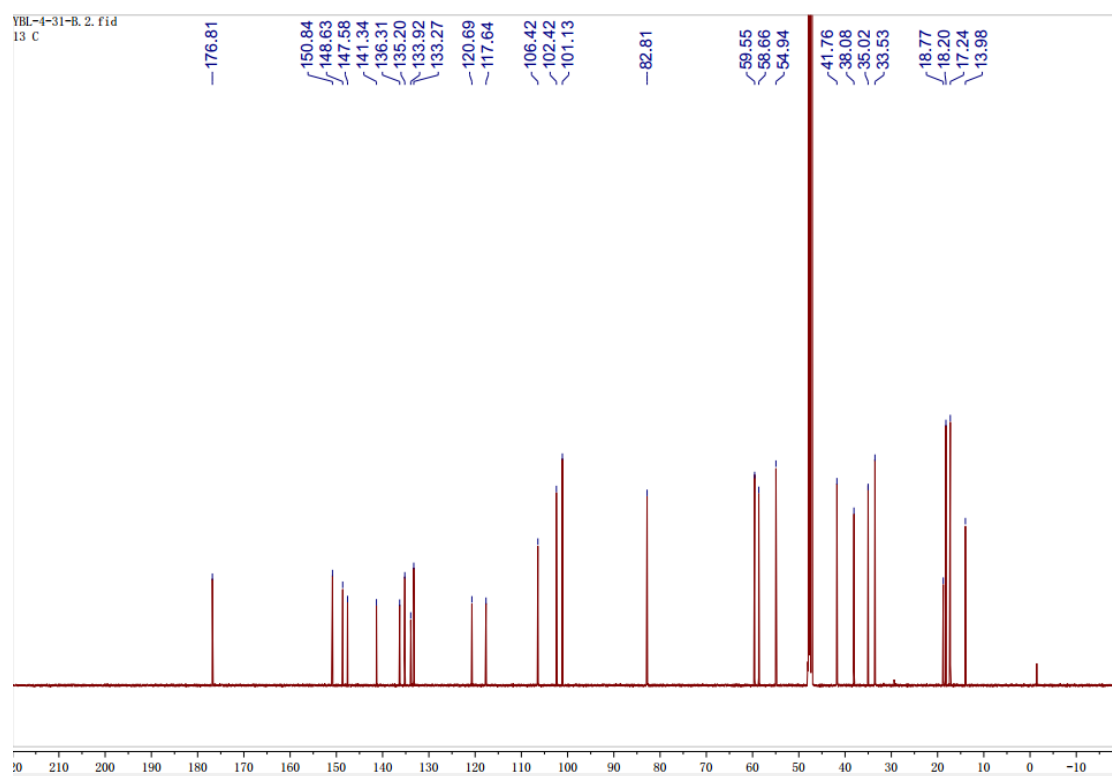

**Figure S28.** <sup>1</sup>H NMR (600 MHz, CDCl<sub>3</sub>) spectrum of isovaleroylbinankadsurin A (8)

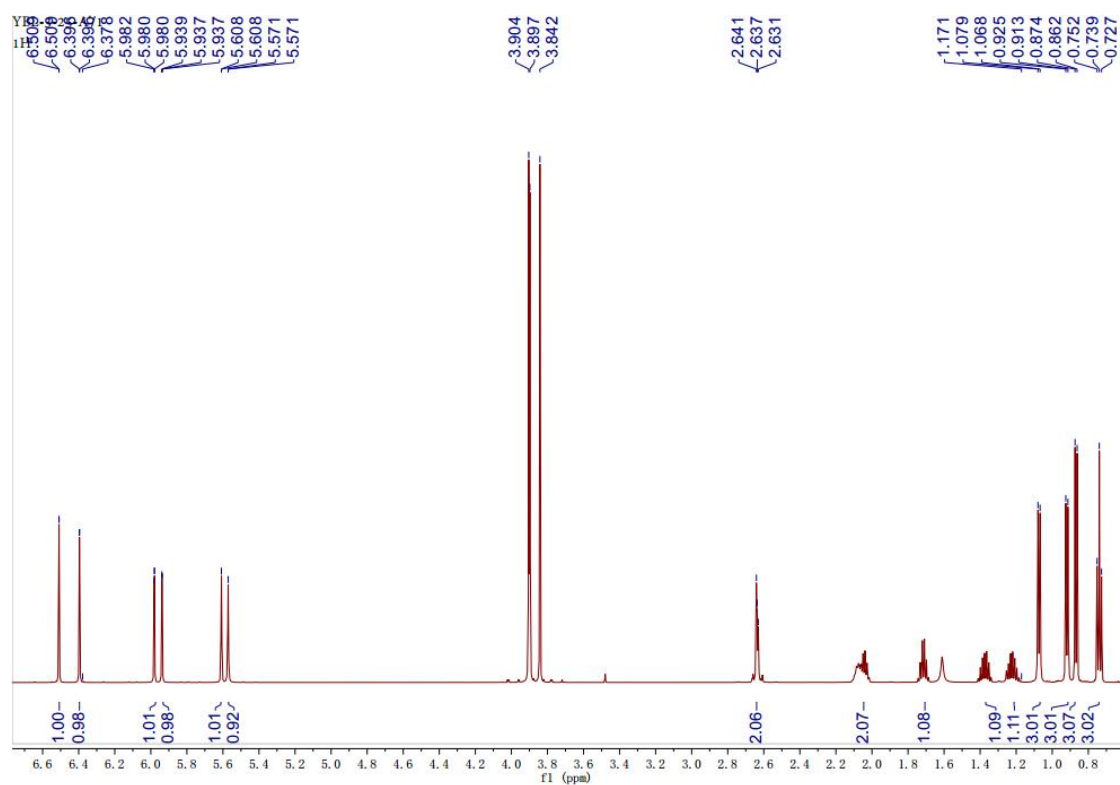

**Figure S29.** <sup>13</sup>C NMR (150 MHz, CDCl<sub>3</sub>) spectrum of isovaleroylbinankadsurin A (8)

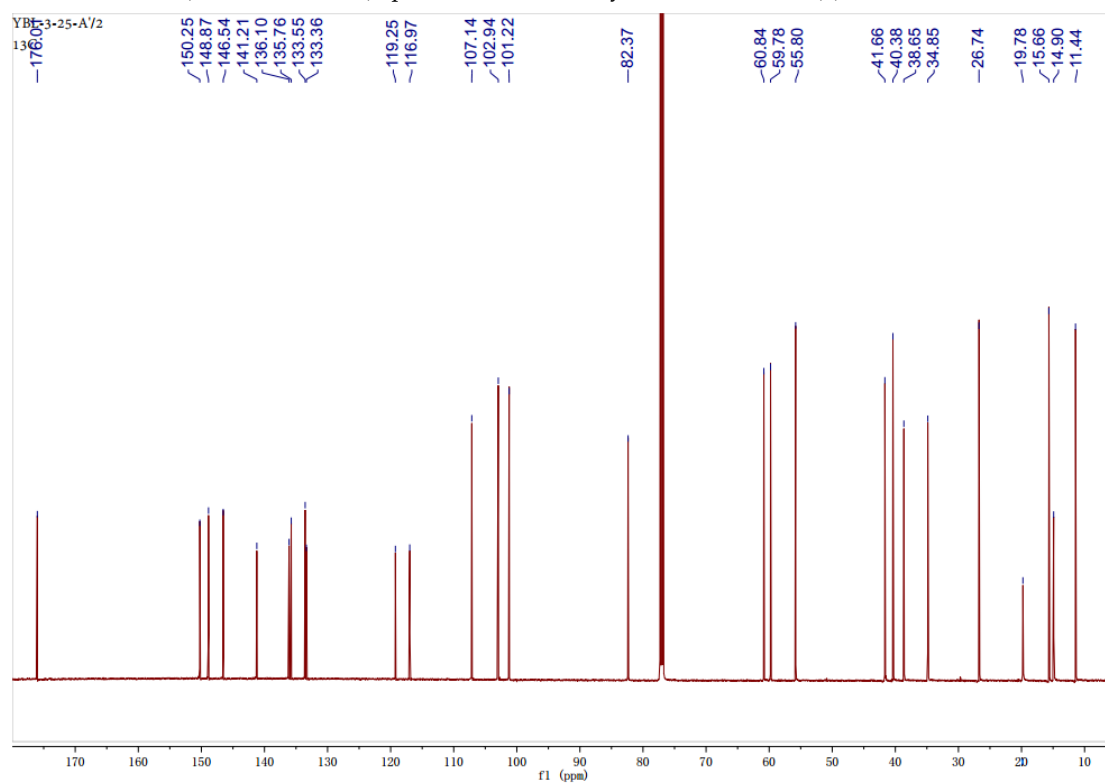

**Figure S30.** <sup>13</sup>C NMR (150 MHz, CDCl<sub>3</sub>) spectrum of kadsuralignan I (9)

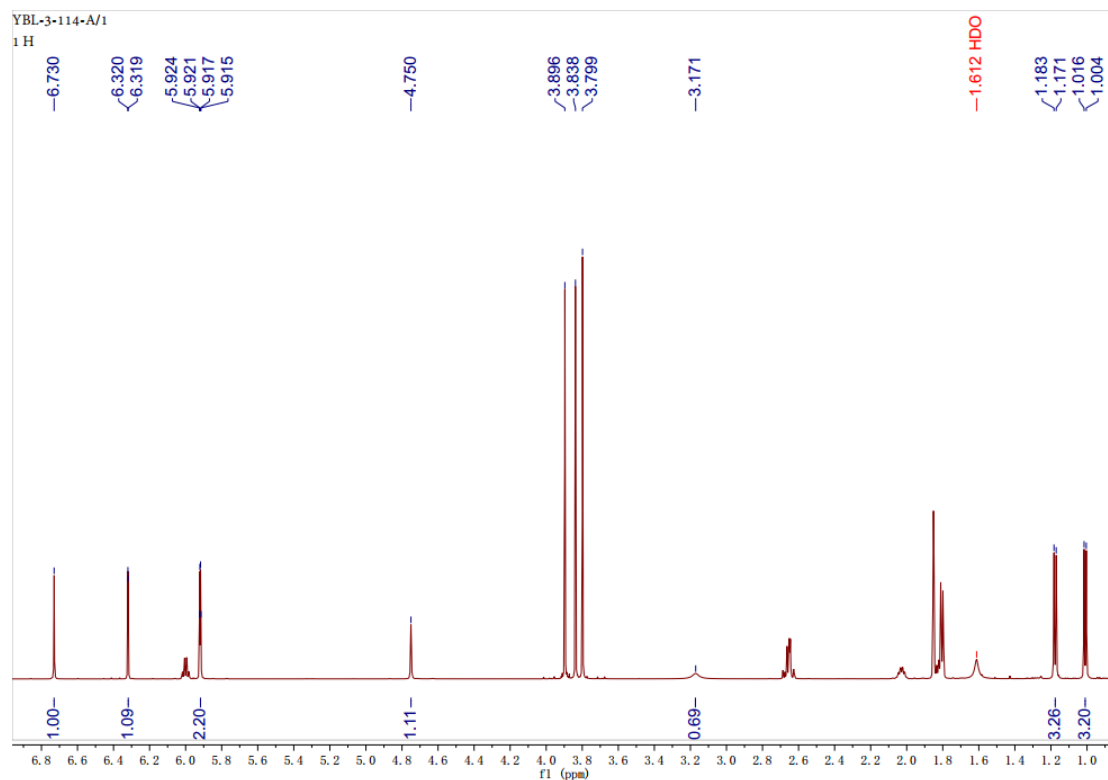

Figure S31. <sup>13</sup>C NMR (150 MHz, CDCl<sub>3</sub>) spectrum of kadsuralignan I (9)

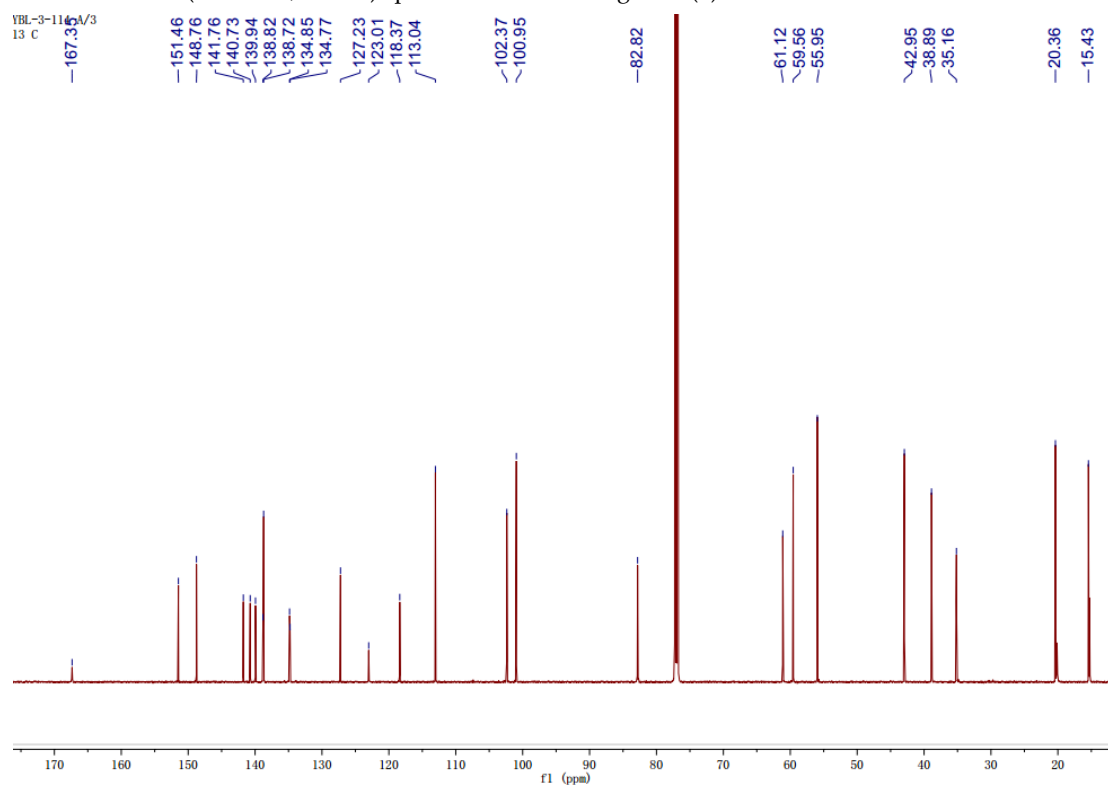

Figure S32. <sup>1</sup>H NMR (600 MHz, CDCl<sub>3</sub>) spectrum of kadsuralignan J (10)

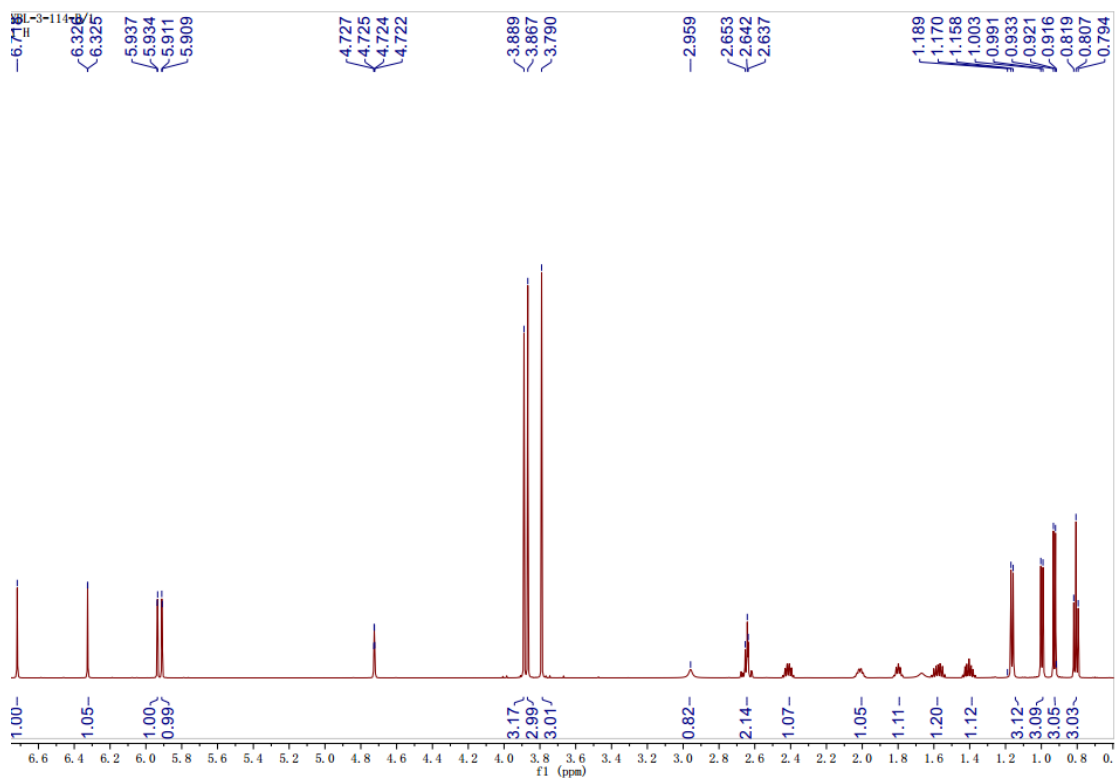

Figure S33. <sup>13</sup>C NMR (150 MHz, CDCl<sub>3</sub>) spectrum of kadsuralignan J (10)

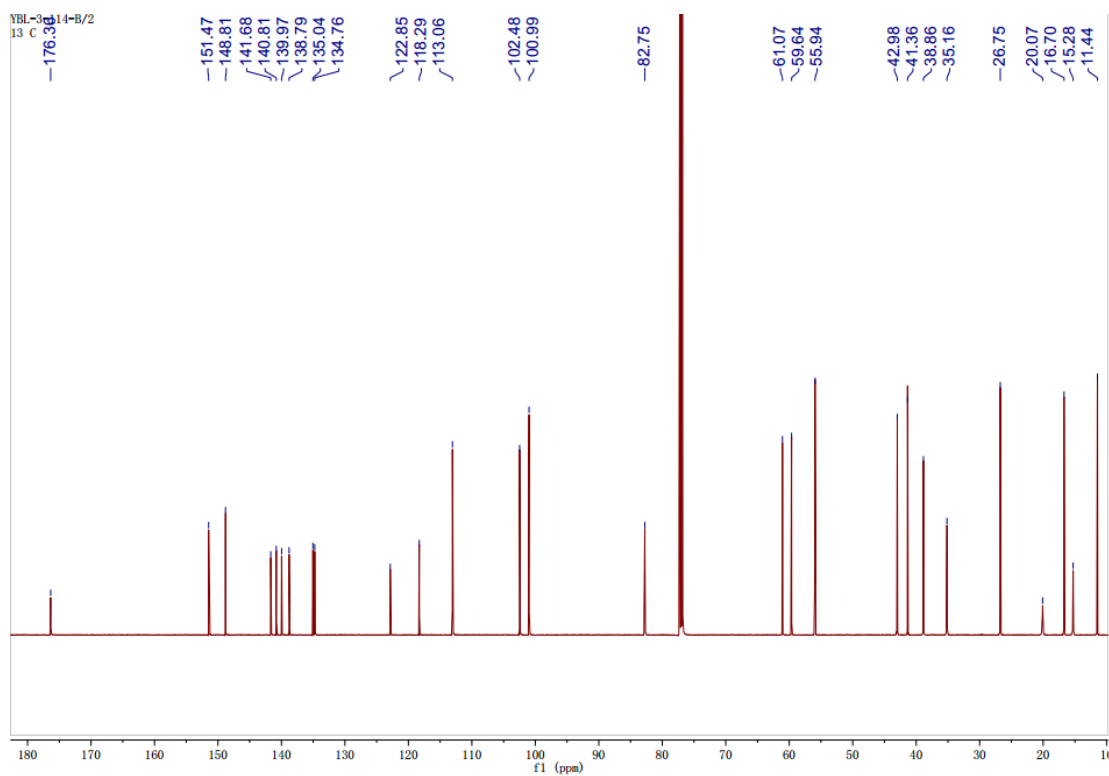

Figure S34. <sup>13</sup>C NMR (150 MHz, CDCl<sub>3</sub>) spectrum of kadsuralignan L (11)

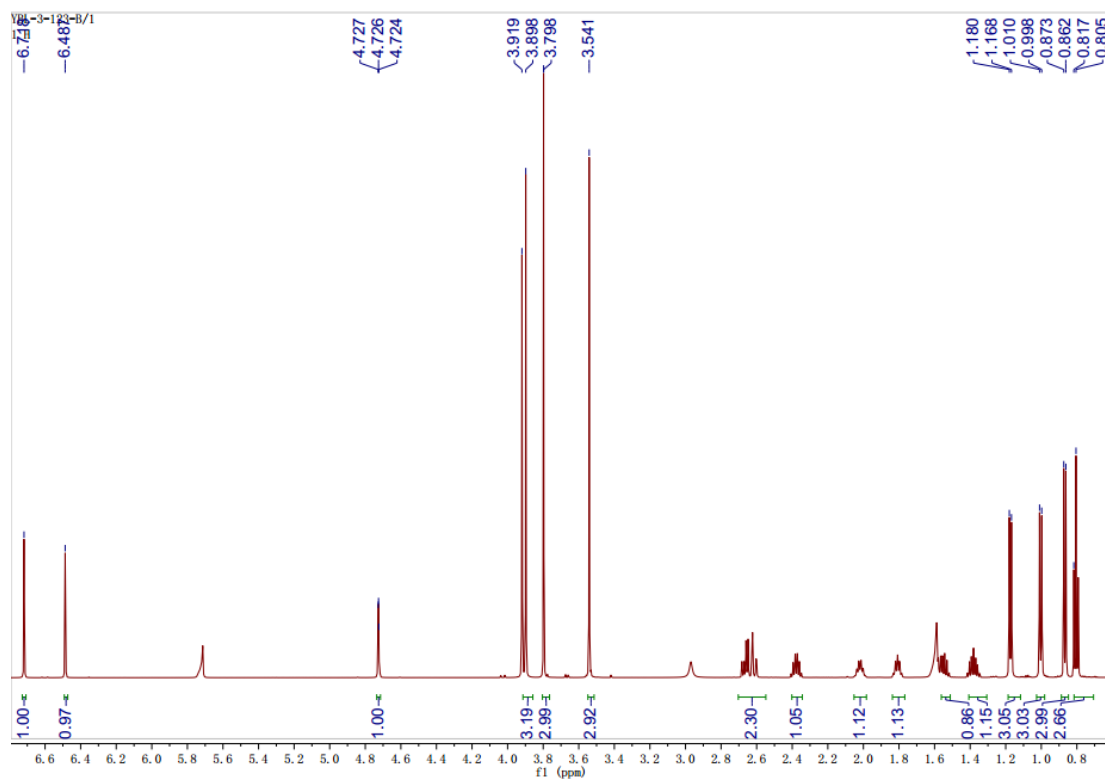

Figure S35. <sup>13</sup>C NMR (150 MHz, CDCl<sub>3</sub>) spectrum of kadsuralignan L (11)

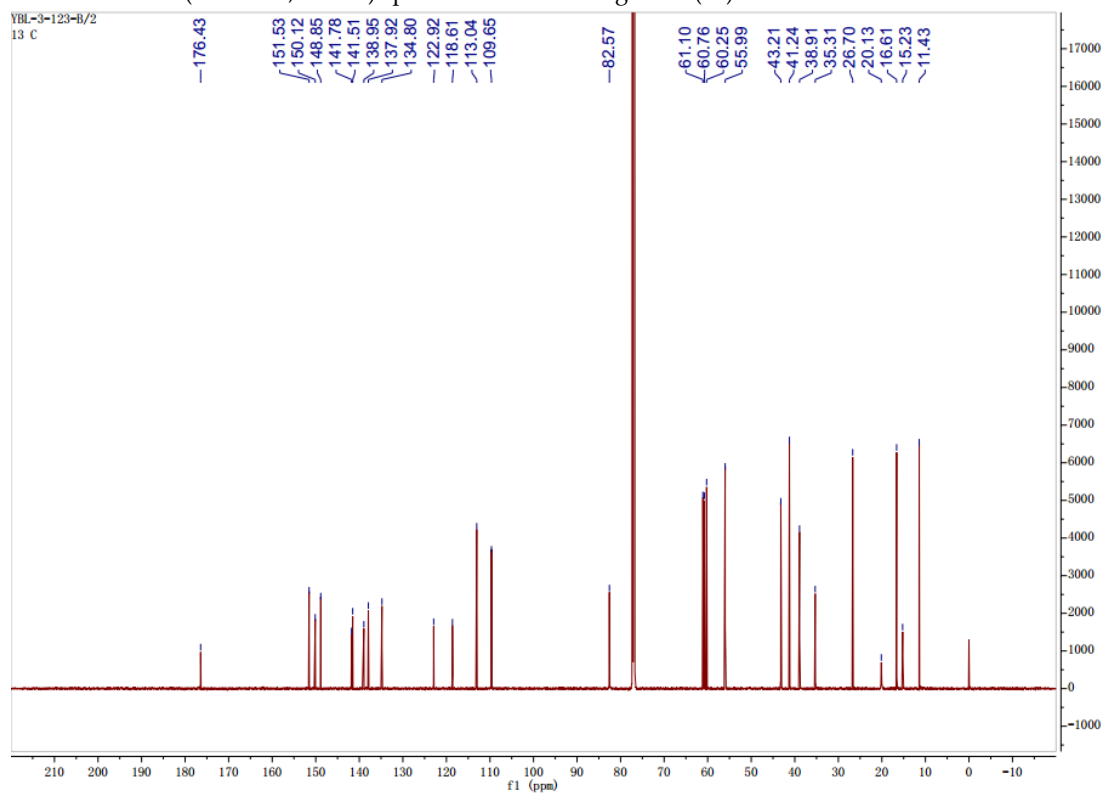

Figure S36. <sup>1</sup>H NMR (600 MHz, CDCl<sub>3</sub>) spectrum of kadsulignan N (12)

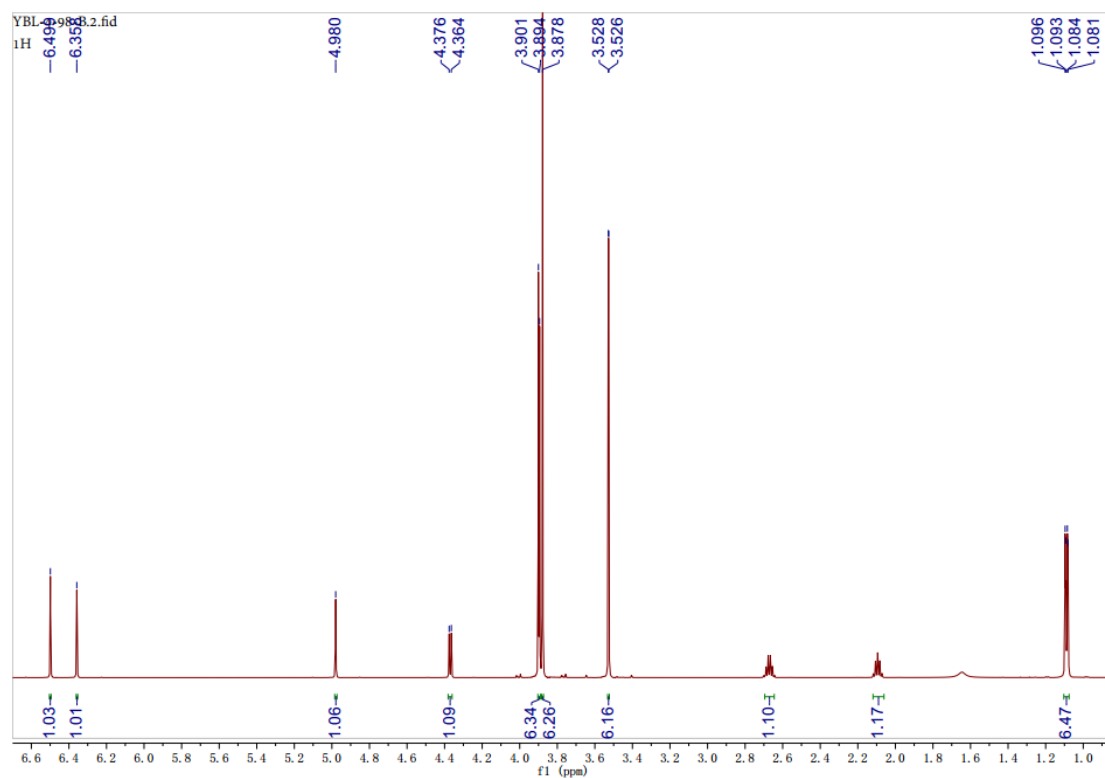

Figure S37. <sup>13</sup>C NMR (150 MHz, CDCl<sub>3</sub>) spectrum of kadsulignan N (12)

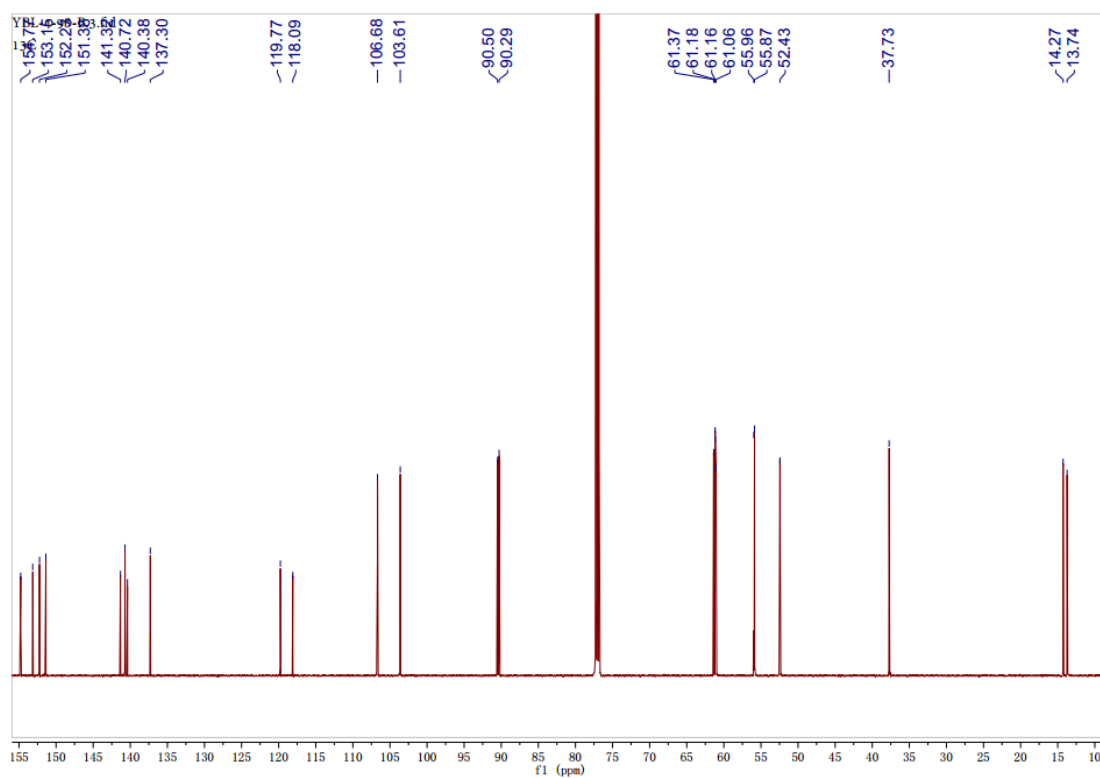

Figure S38. <sup>1</sup>H NMR (600 MHz, CDCl<sub>3</sub>) spectrum of longipedunin B (13)

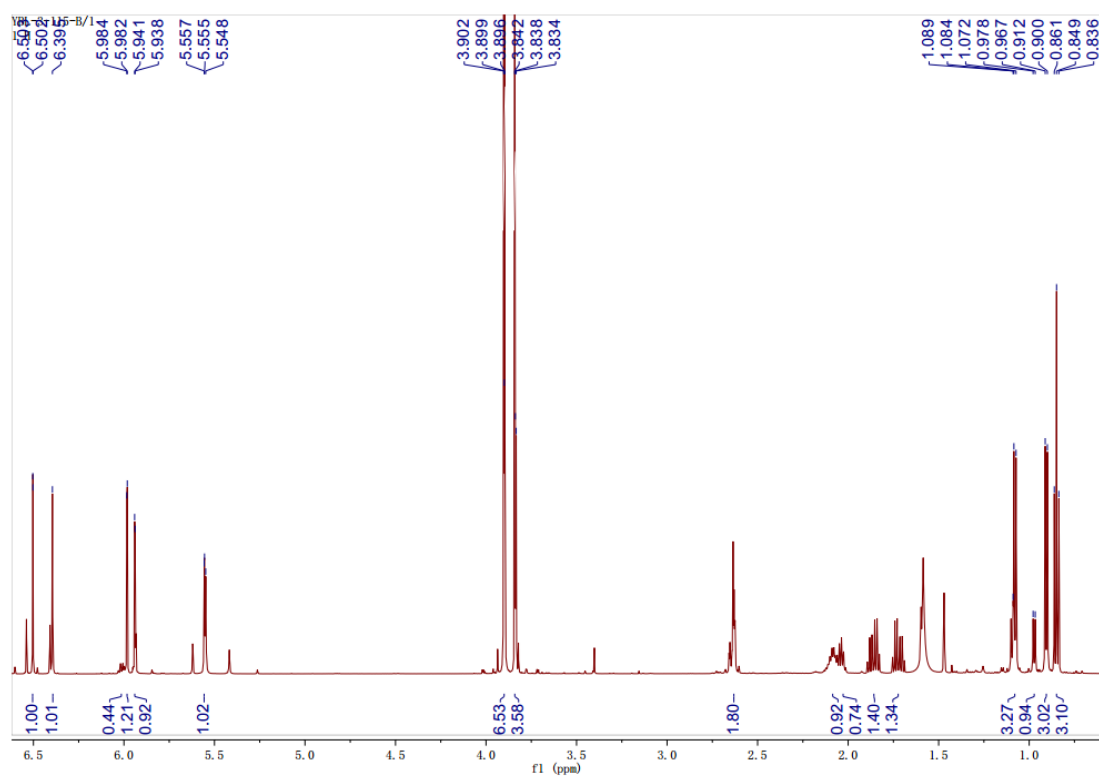

Figure S39. <sup>13</sup>C NMR (150 MHz, CDCl<sub>3</sub>) spectrum of longipedunin B (13)

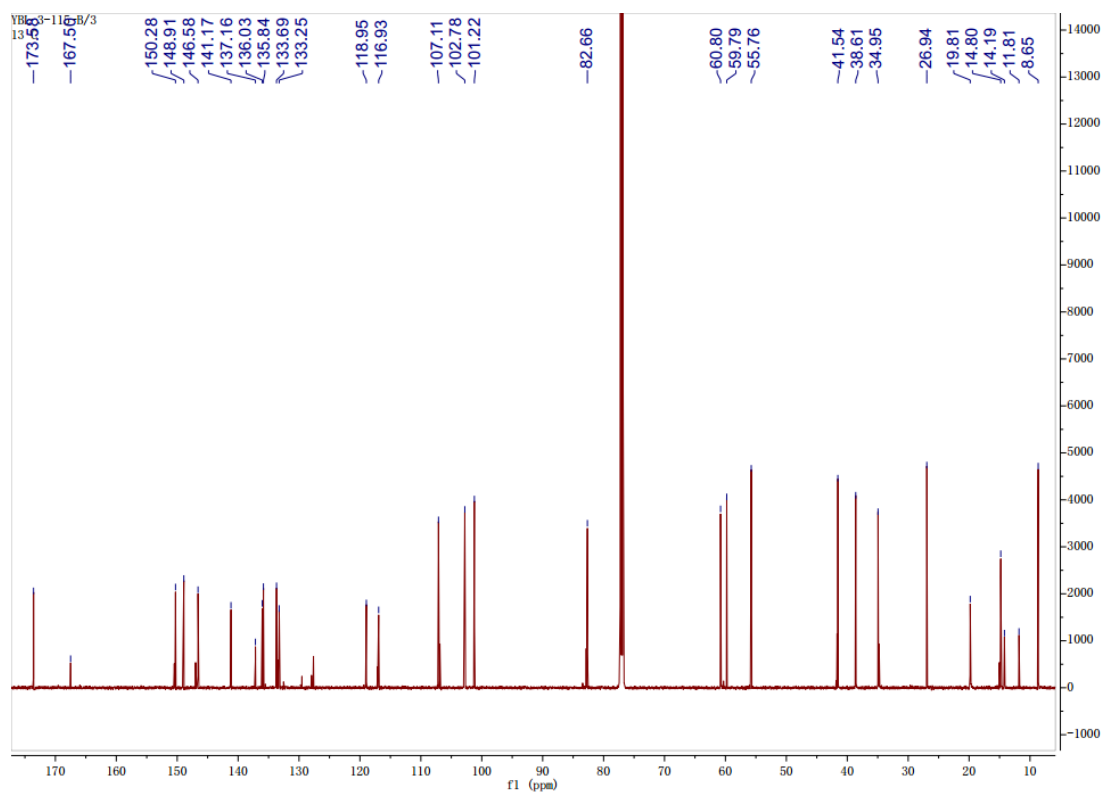

Figure S40. <sup>1</sup>H NMR (600 MHz, CDCl<sub>3</sub>) spectrum of schisantherin F (14)

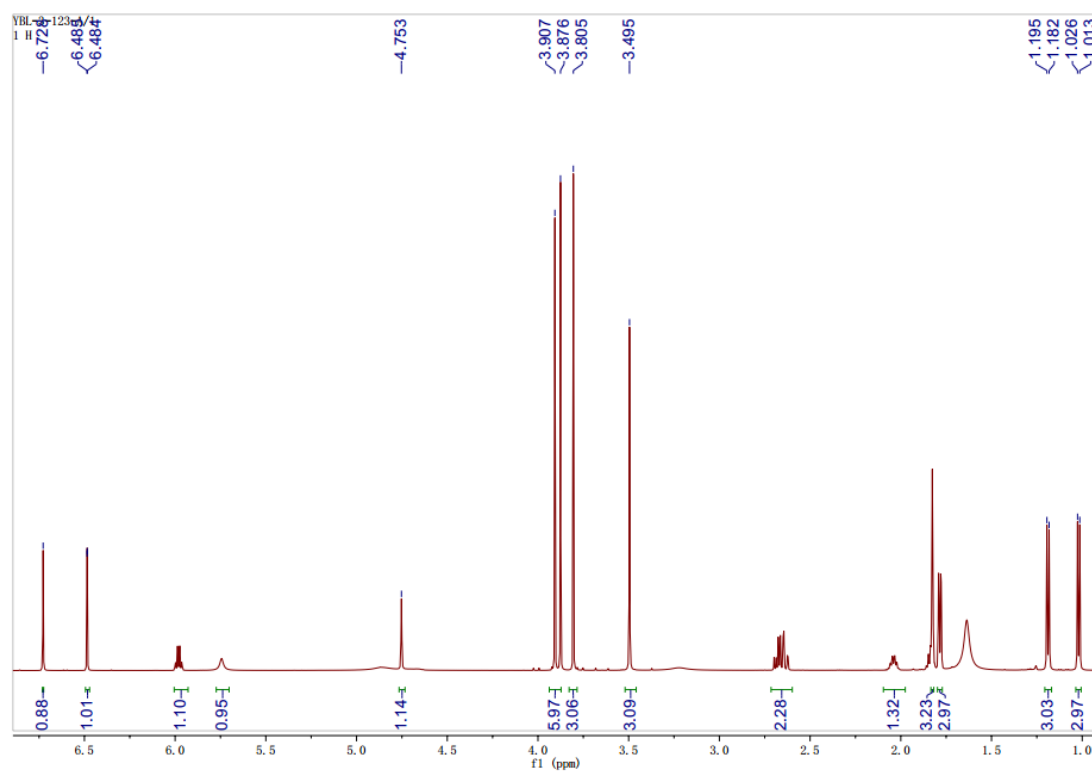

Figure S41. <sup>13</sup>C NMR (150 MHz, CDCl<sub>3</sub>) spectrum of schisantherin F (**14**)

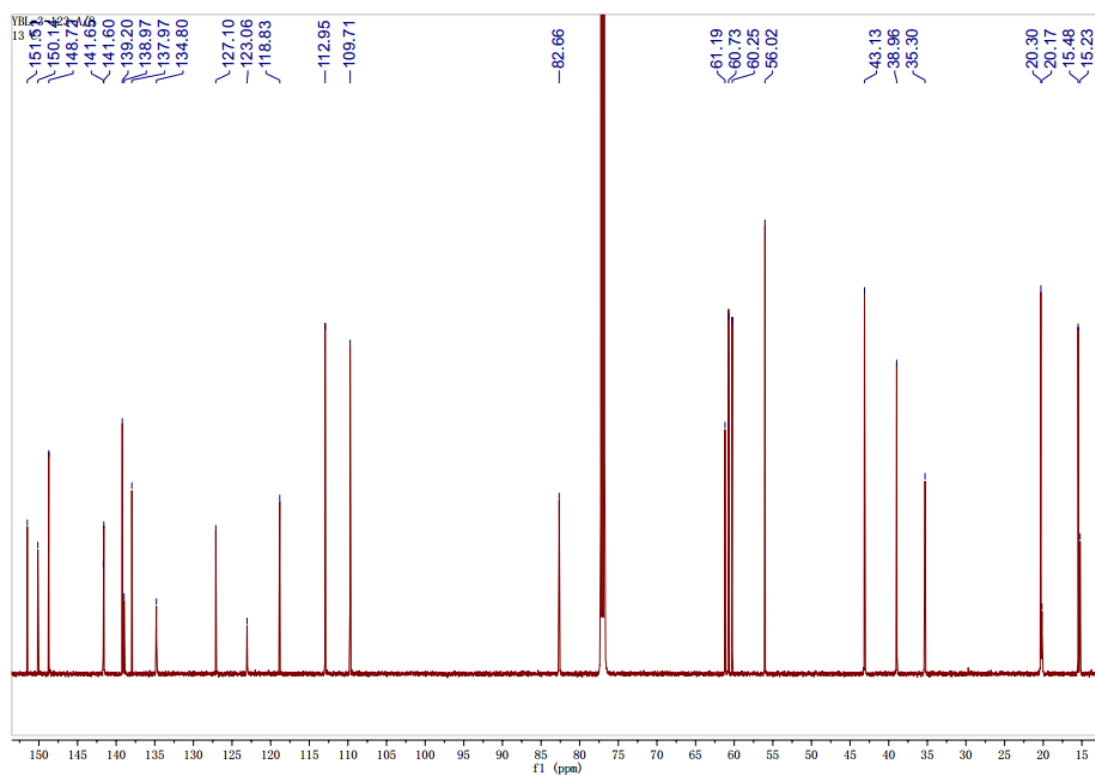

Figure S42. <sup>1</sup>H NMR (600 MHz, MeOD) spectrum of schizanrin D (**15**)



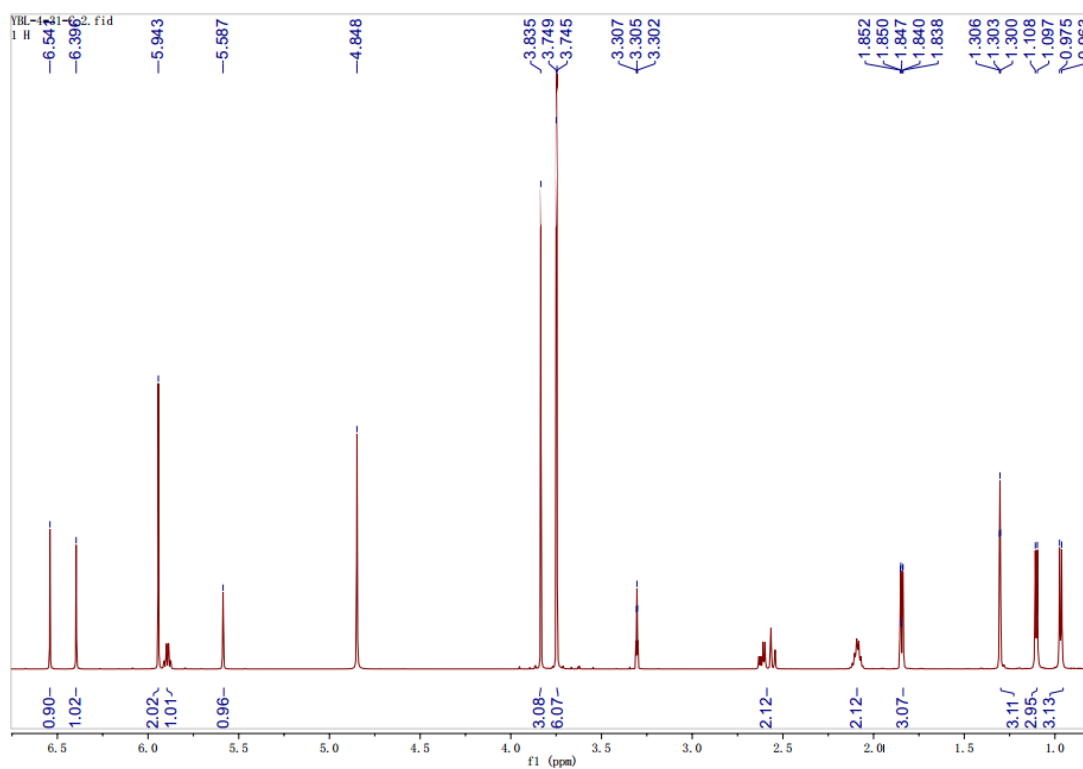

**Figure S43.**  $^{13}\text{C}$  NMR (150 MHz, MeOD) spectrum of schizanrin D (15)

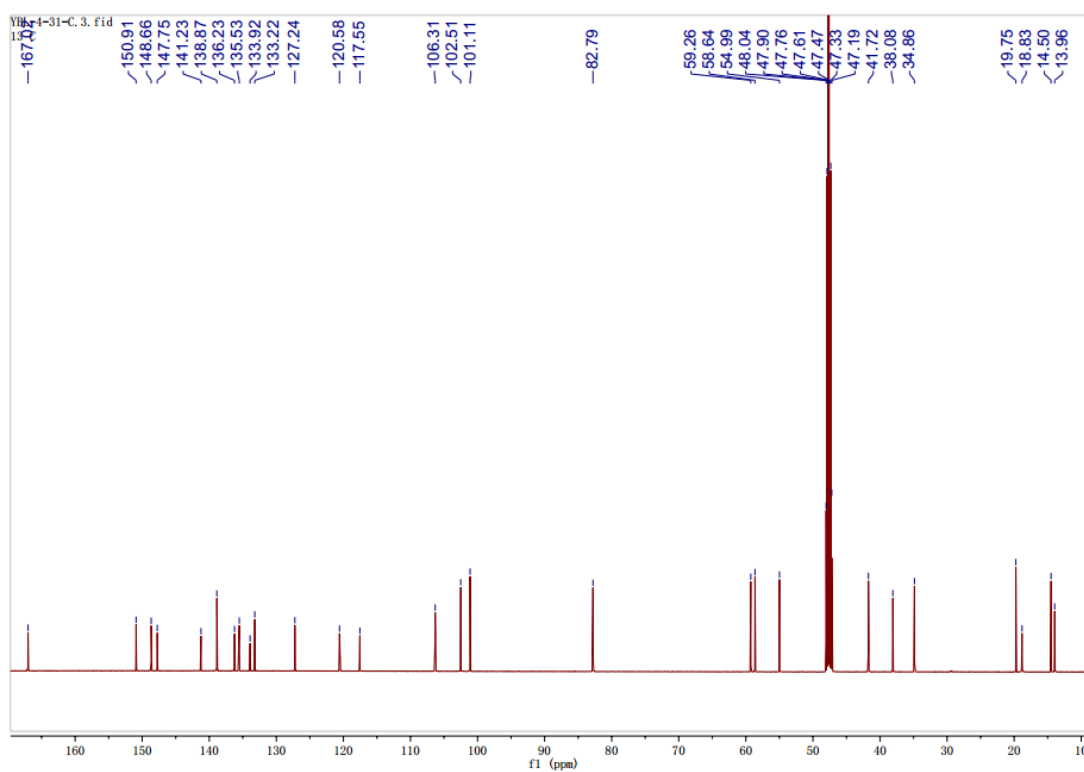

**Figure S44.**  $^1\text{H}$  NMR (600 MHz, MeOD) spectrum of acetylgomisin R (16)

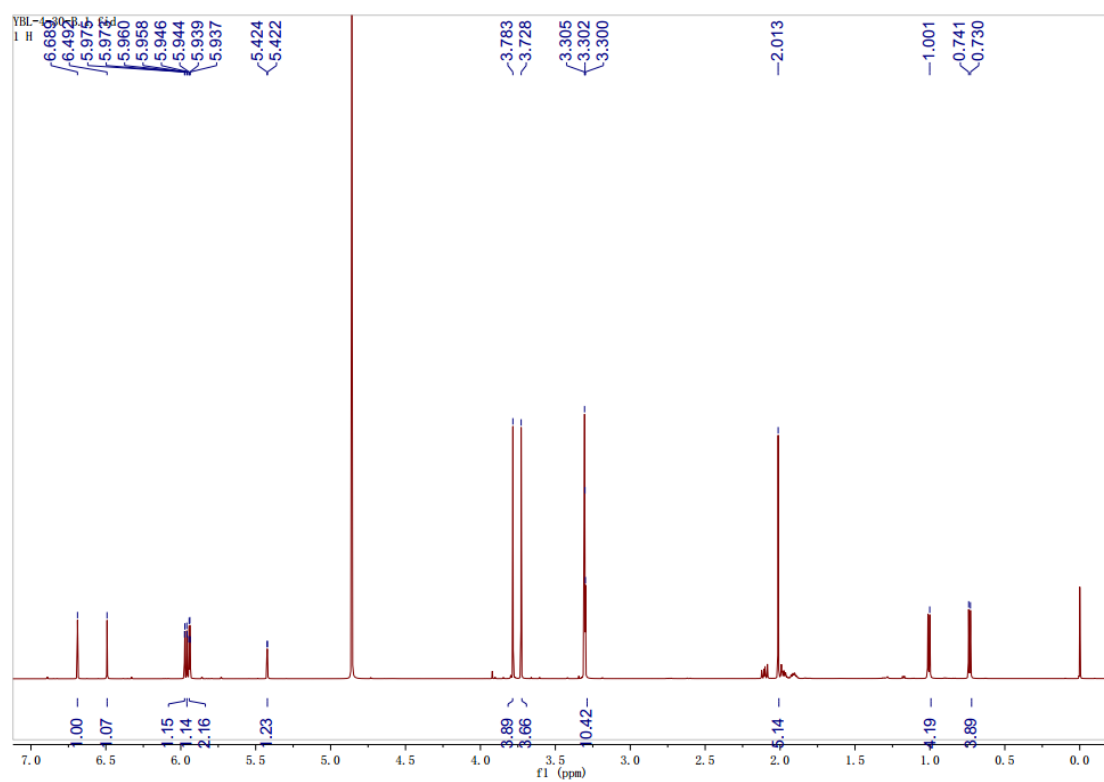

Figure S45. <sup>13</sup>C NMR (150 MHz, MeOD) spectrum of acetylgomisin R (**16**)

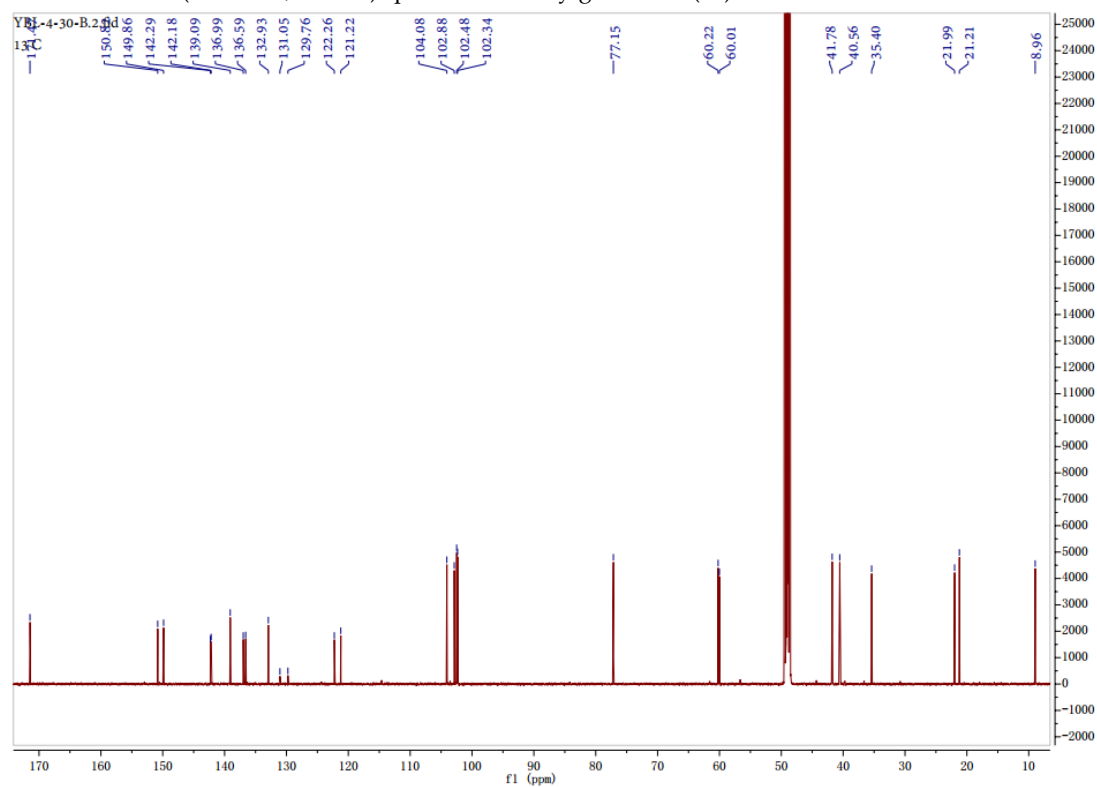

Figure S46. <sup>1</sup>H NMR (600 MHz, CDCl<sub>3</sub>) spectrum of intermedin A (**17**)

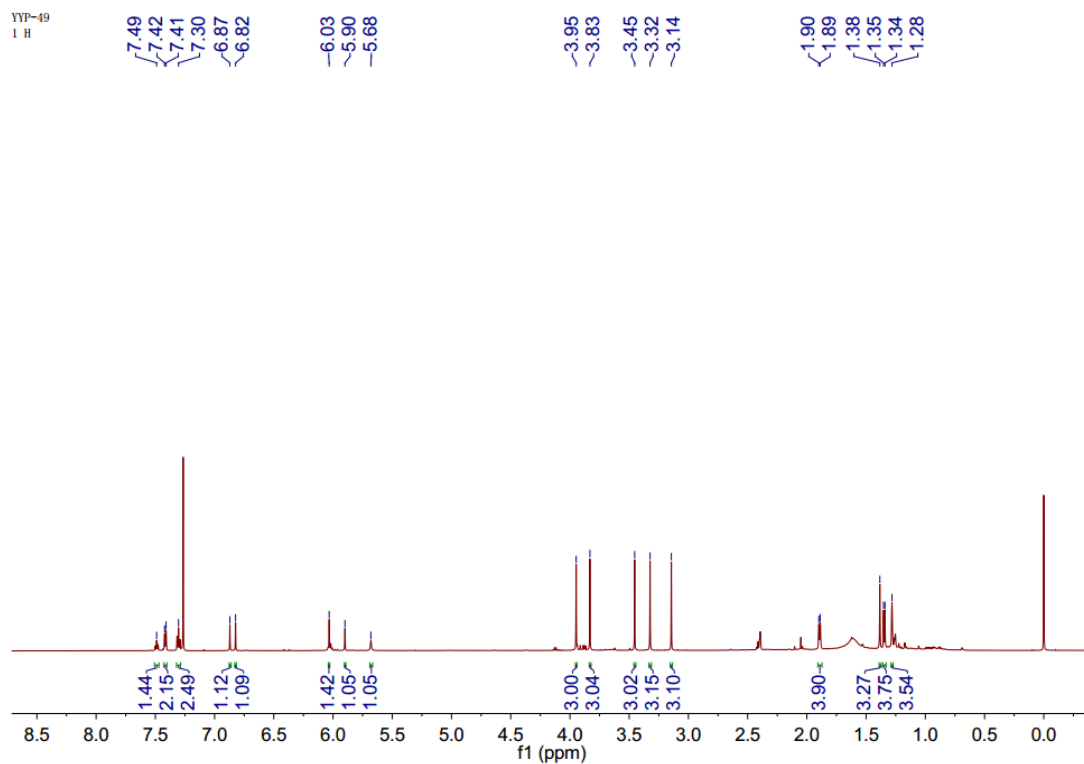

**Figure S47.**  $^{13}\text{C}$  NMR (150 MHz,  $\text{CDCl}_3$ ) spectrum of intermedin A (17)

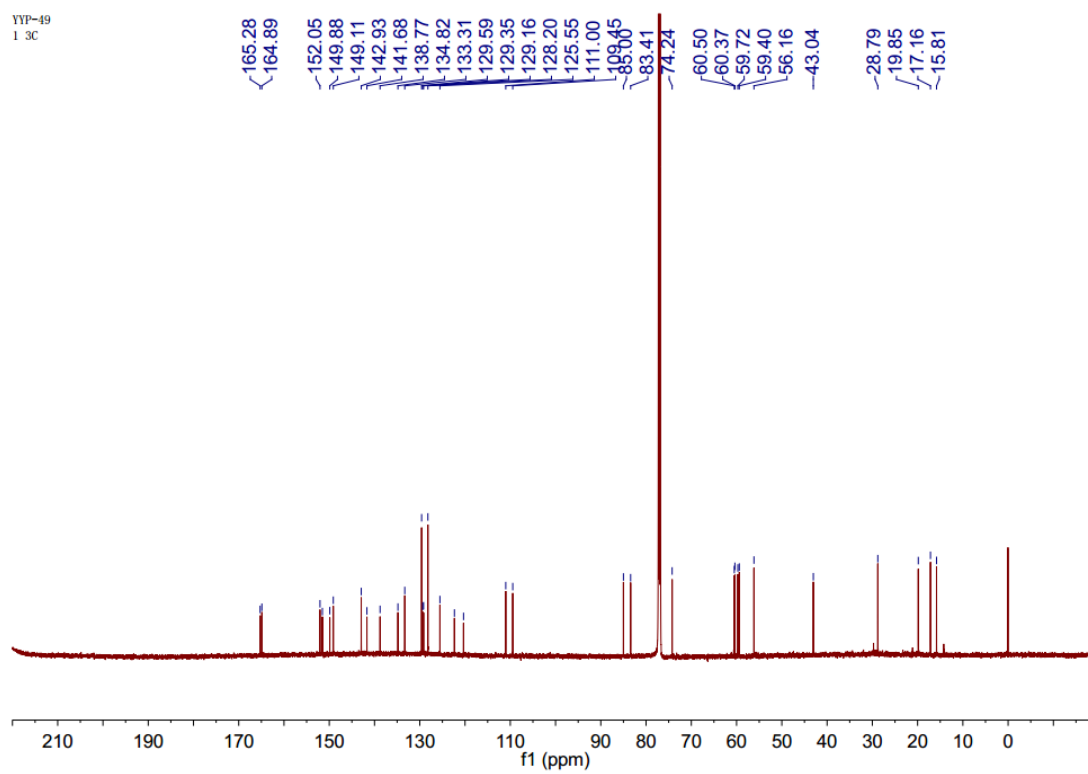

**Figure S48.**  $^1\text{H}$  NMR (600 MHz,  $\text{CDCl}_3$ ) spectrum of kadsurarin (18)

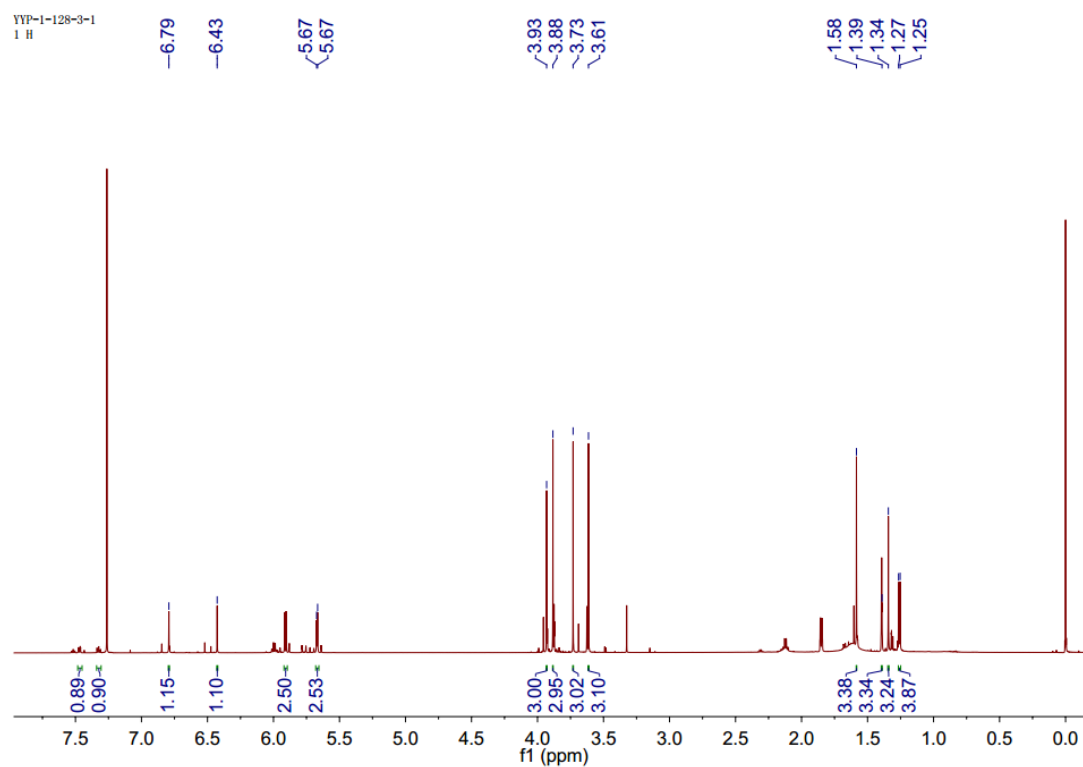

**Figure S49.**  $^{13}\text{C}$  NMR (150 MHz,  $\text{CDCl}_3$ ) spectrum of kadsurarin (**18**)

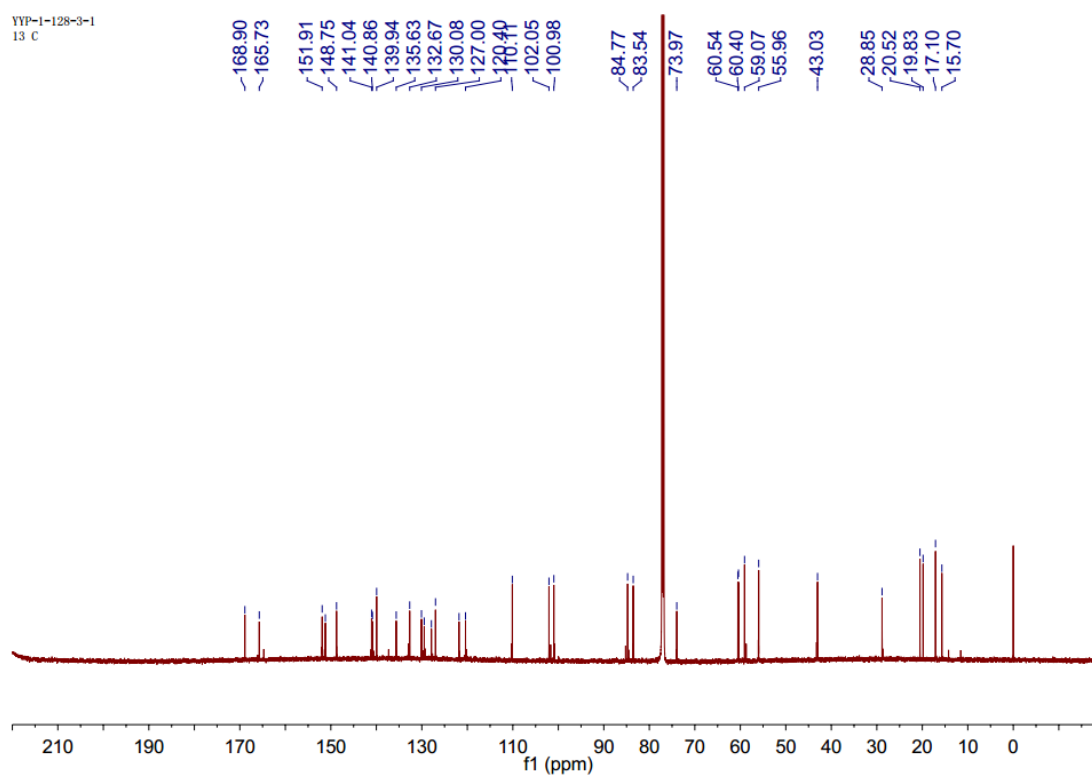

**Figure S50.**  $^1\text{H}$  NMR (600 MHz,  $\text{CDCl}_3$ ) spectrum of kadsutherin A (**19**)

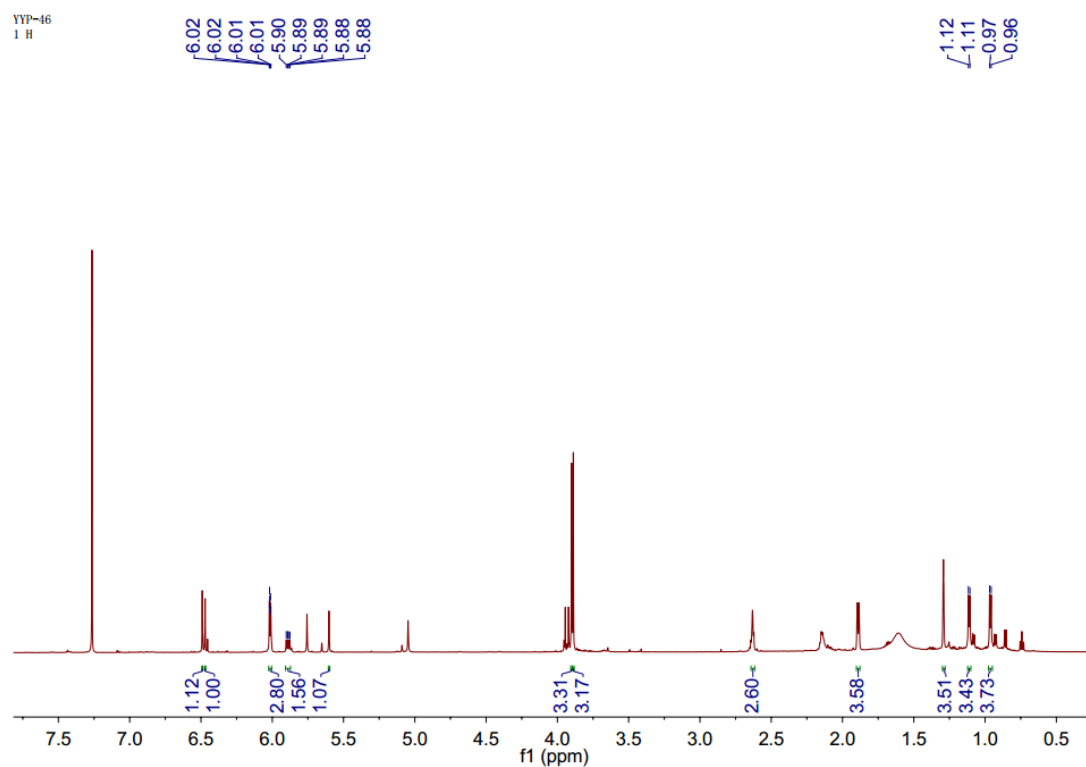

**Figure S51.**  $^{13}\text{C}$  NMR (150 MHz,  $\text{CDCl}_3$ ) spectrum of kadsutherin A (**19**)

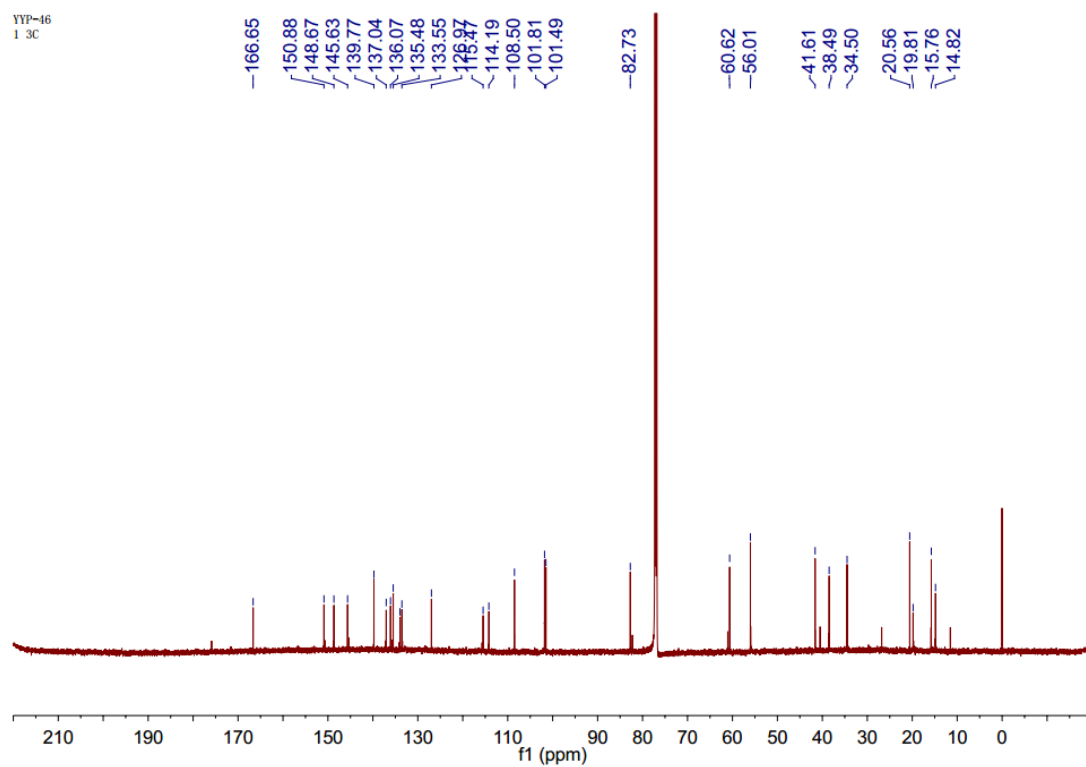

**Figure S52.**  $^1\text{H}$  NMR (600 MHz,  $\text{CDCl}_3$ ) spectrum of kadsuphilol A (**20**)

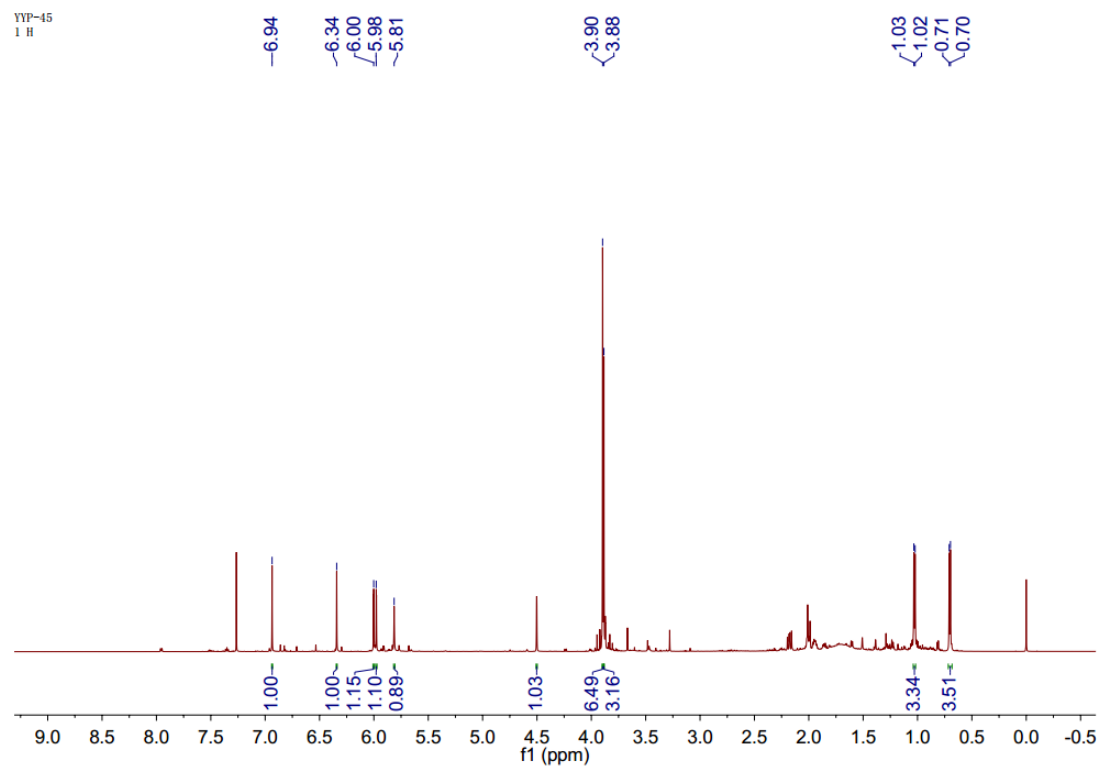

**Figure S53.** <sup>13</sup>C NMR (150 MHz, CDCl<sub>3</sub>) spectrum of kadsuphilol A (20)

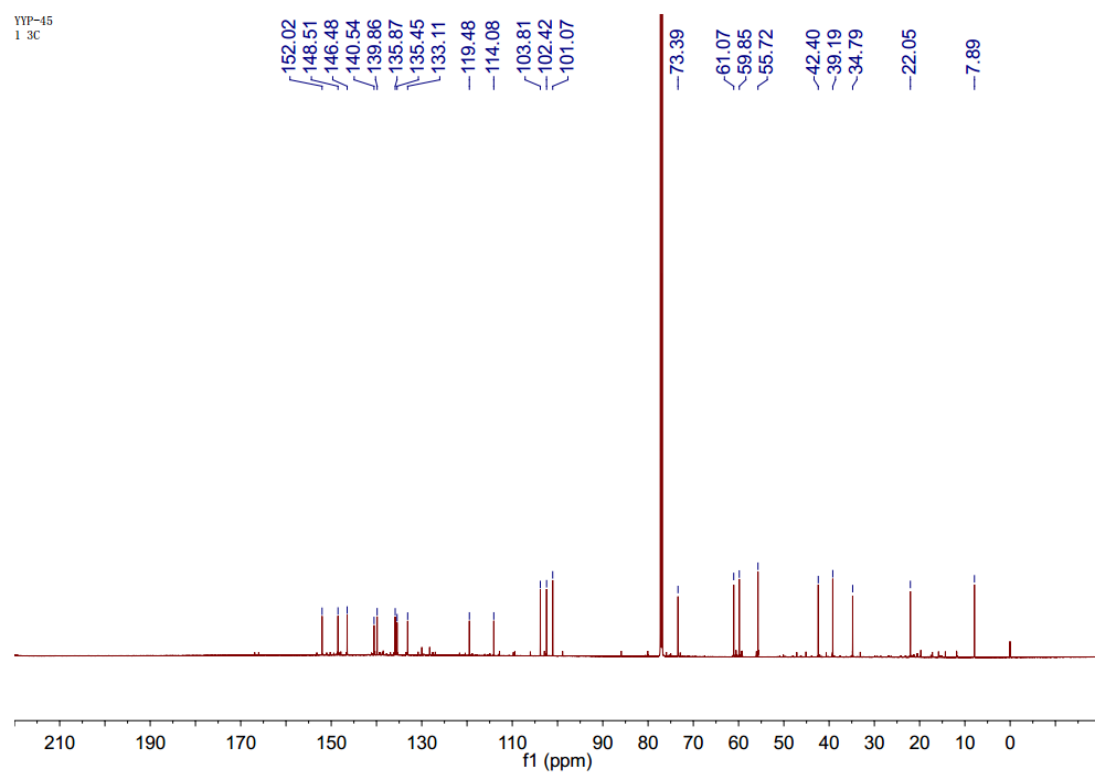

**Figure S54.** <sup>1</sup>H NMR (600 MHz, CDCl<sub>3</sub>) spectrum of meso-dihydroguaiaretic acid dimethyl (21)

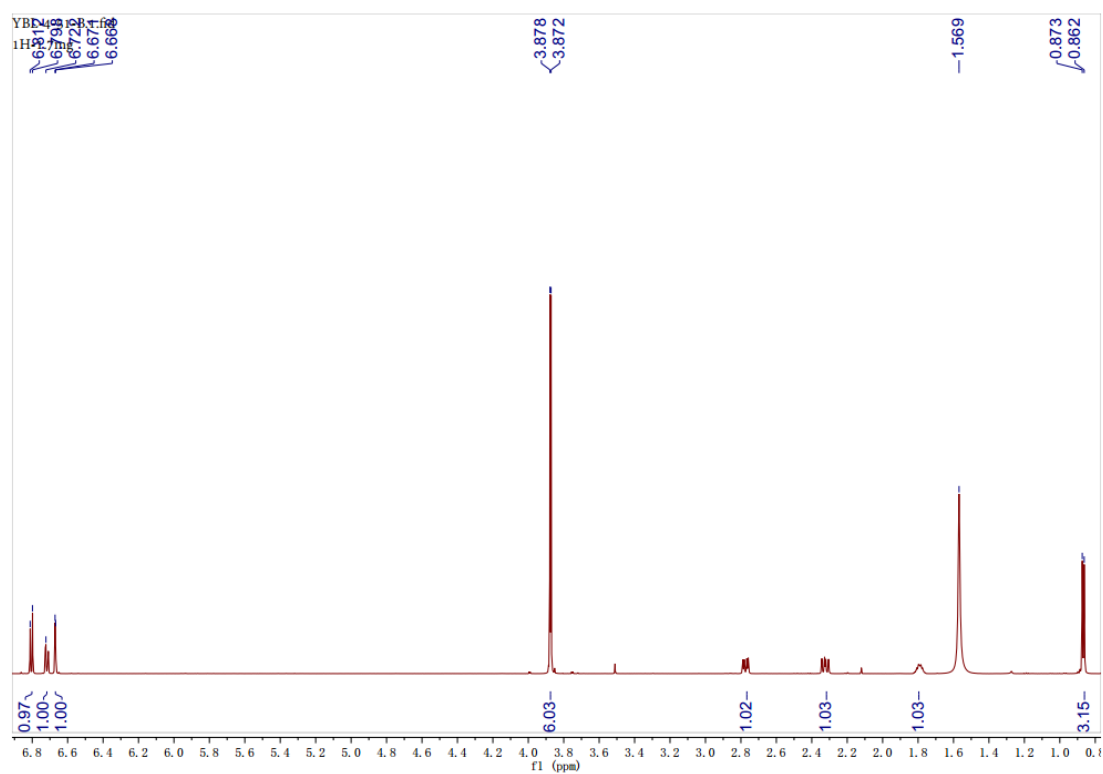

Figure S55. <sup>13</sup>C NMR (150 MHz, CDCl<sub>3</sub>) spectrum of meso-dihydroguaiaretic acid dimethyl (21)

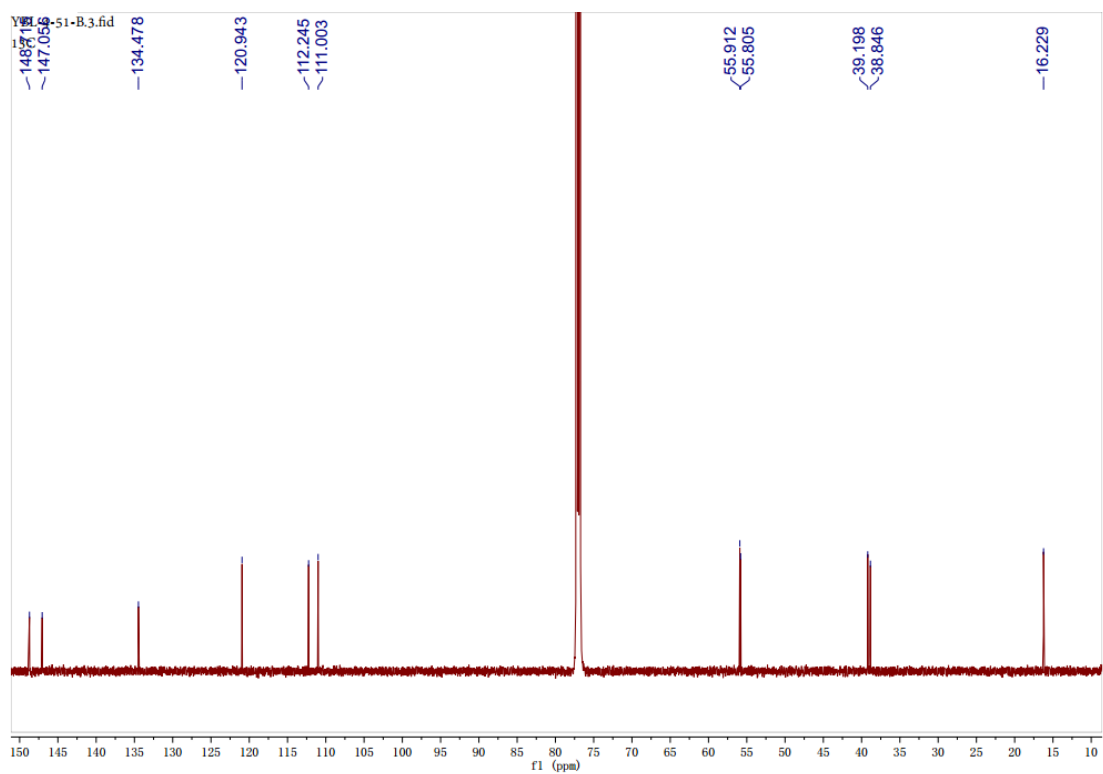

Figure S56. <sup>1</sup>H NMR (600 MHz, CDCl<sub>3</sub>) spectrum of schiarianrin E (22)

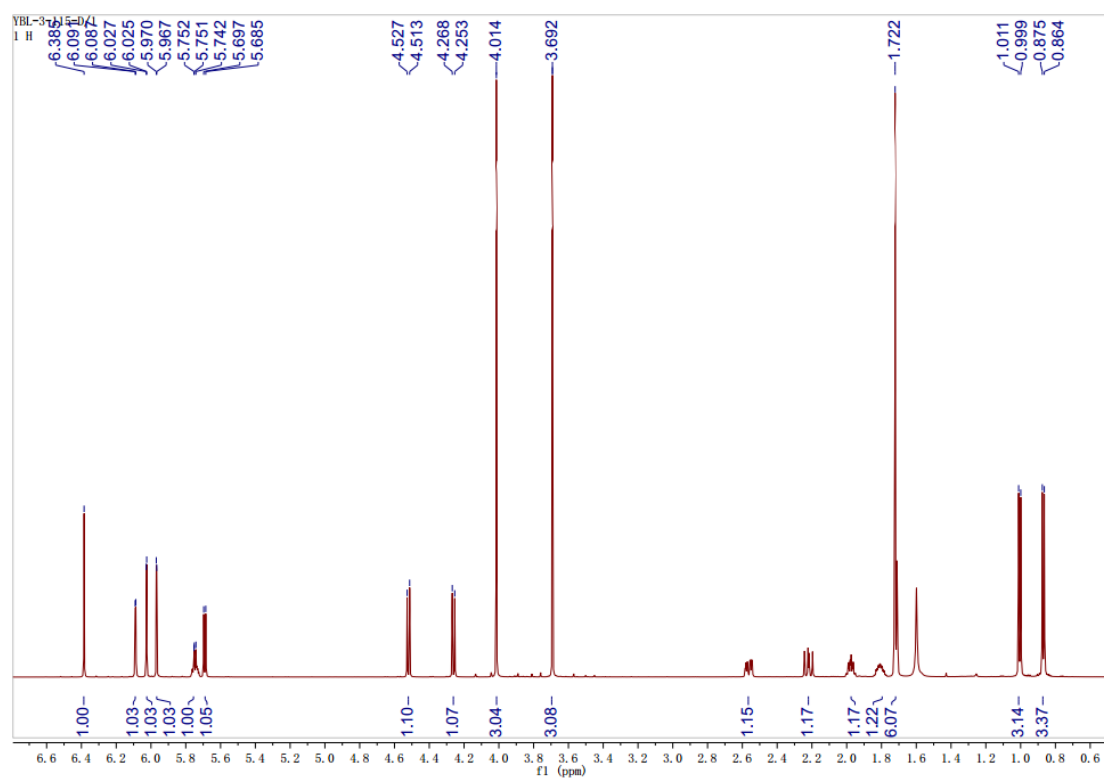

**Figure S57.** <sup>13</sup>C NMR (150 MHz, CDCl<sub>3</sub>) spectrum of schiarianrin E (22)

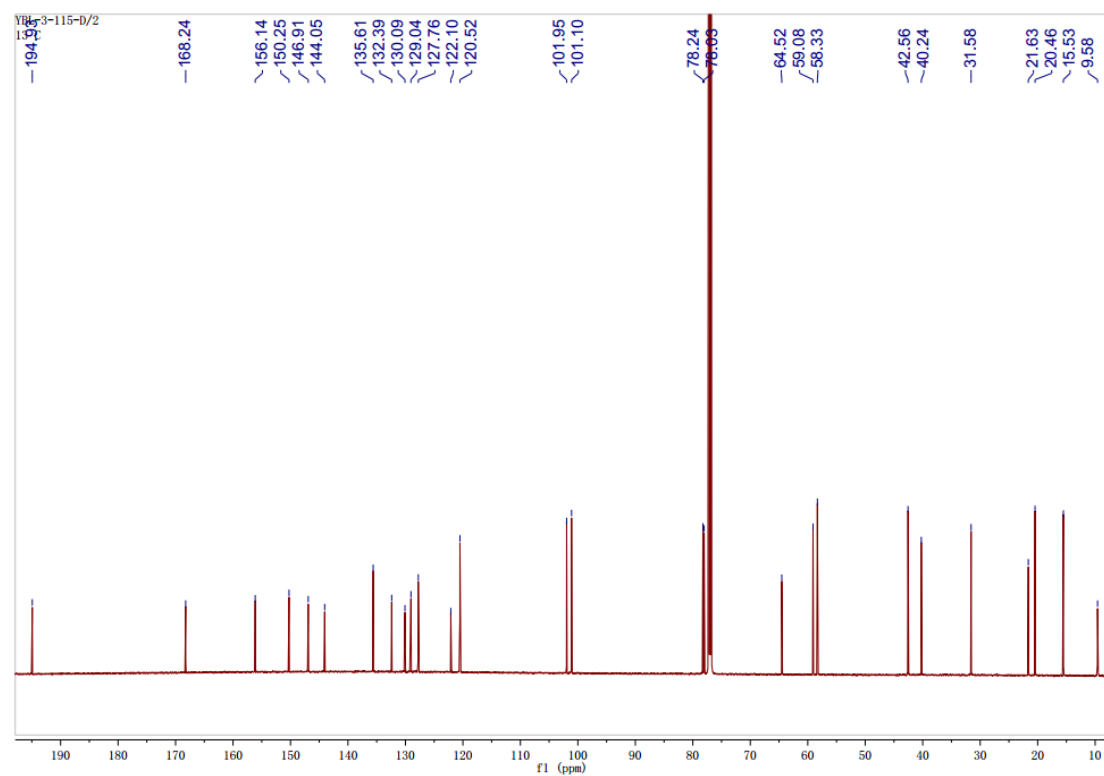

**Figure S58.** <sup>1</sup>H NMR (600 MHz, CDCl<sub>3</sub>) spectrum of schiarianrin A (23)



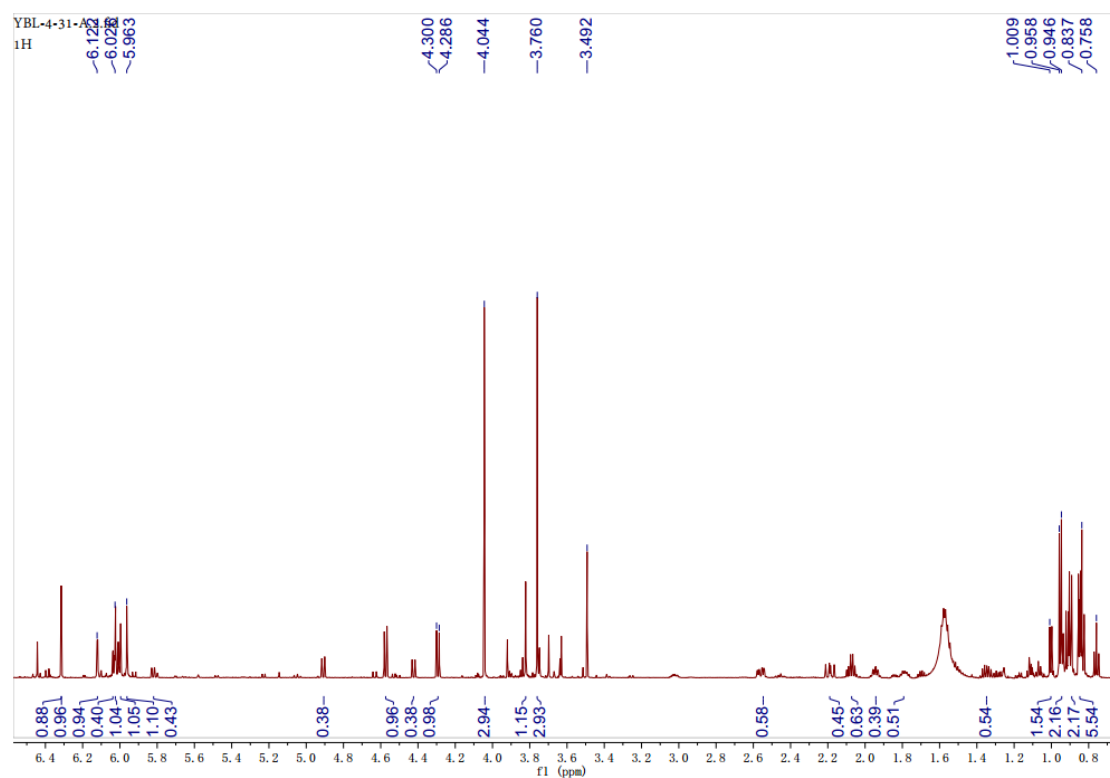

**Figure S59.**  $^{13}\text{C}$  NMR (150 MHz,  $\text{CDCl}_3$ ) spectrum of schiarisanrin A (**23**)

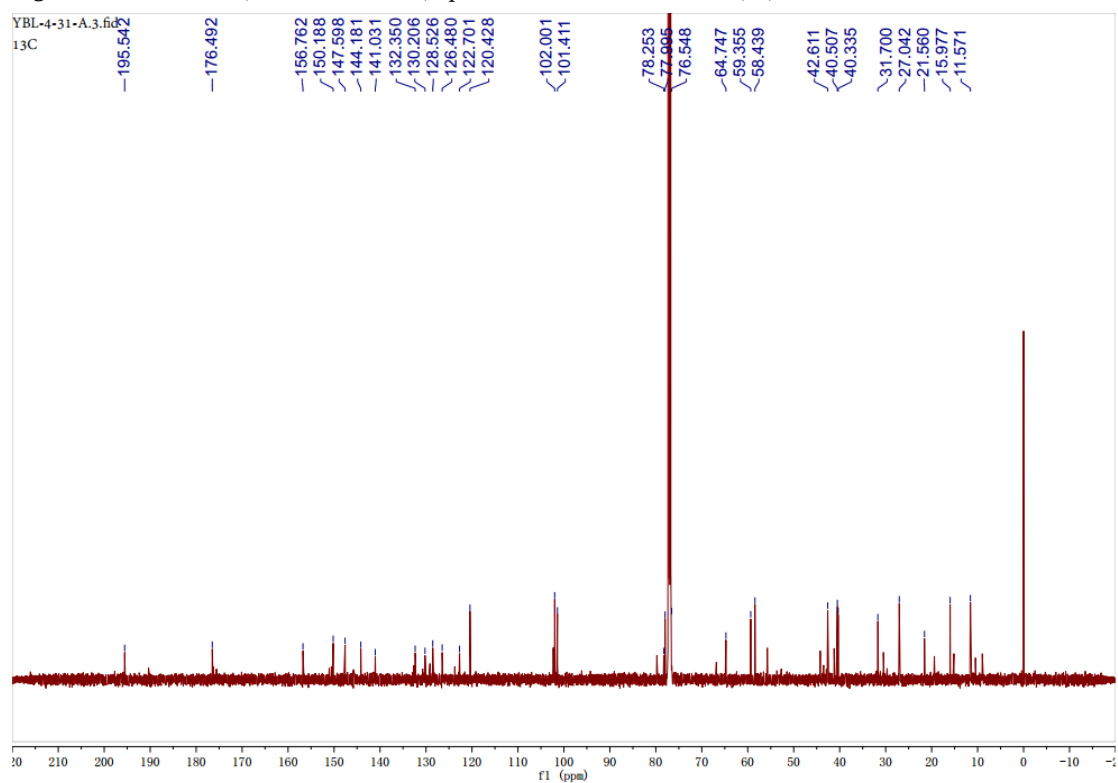

**Figure S60.** HRESIMS spectrum of heilaohulignan A (**1**)

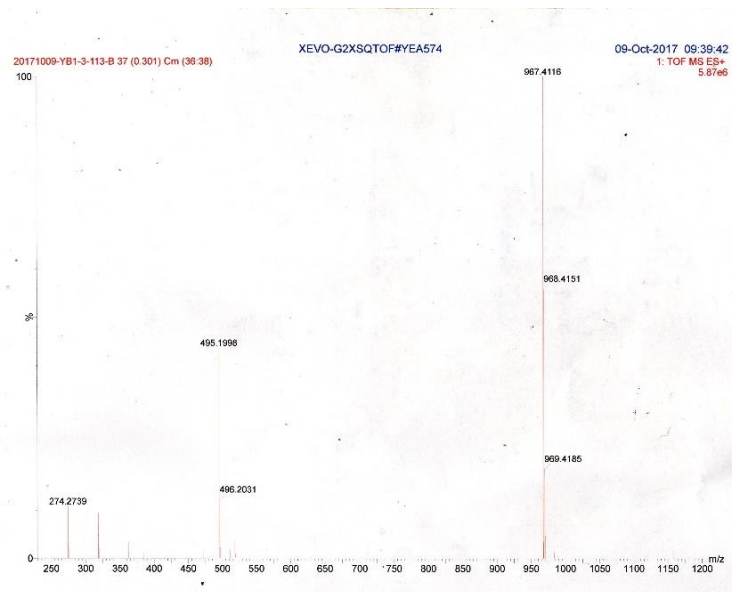

Figure S61. HRESIMS spectrum of heilaohulignan B (2)

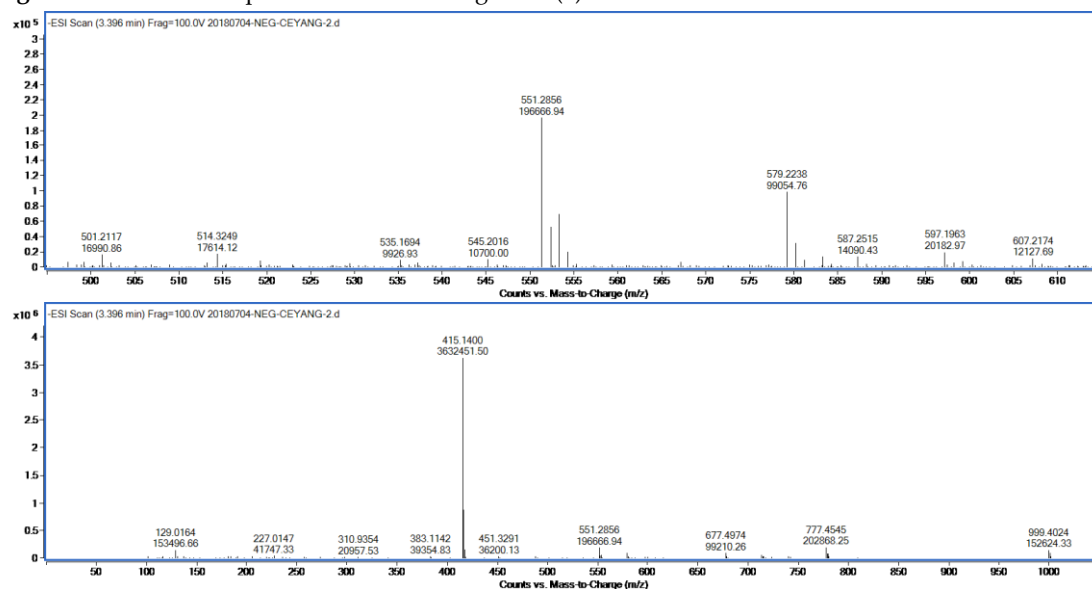

Figure S62. HRESIMS spectrum of heilaohulignan C (3)

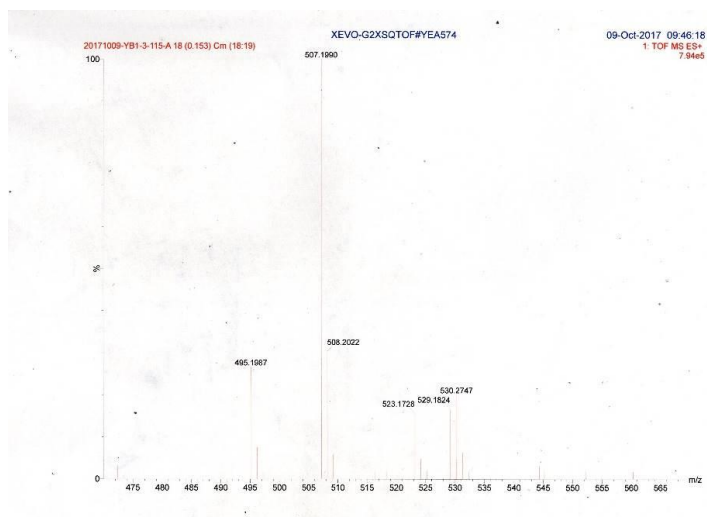

Figure S63. CD spectrum of heilaohulignan A (1)

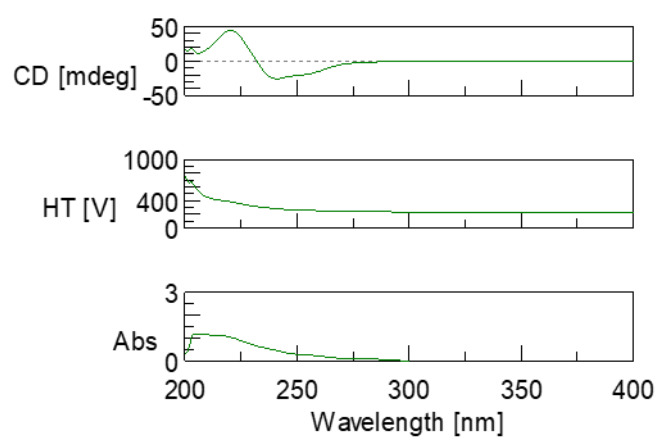

Figure S64. CD spectrum of heilaohulignan B (2)

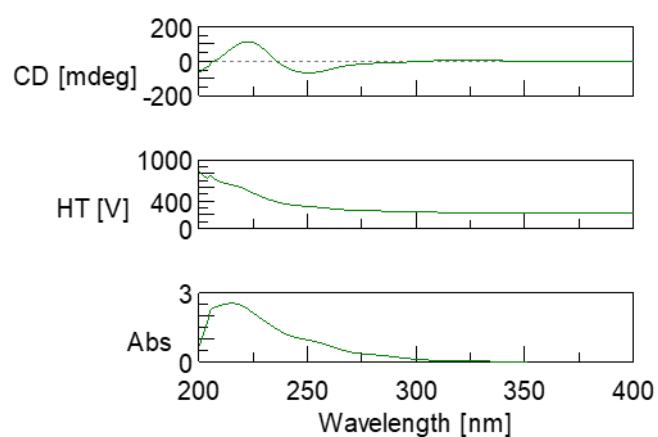

Figure S65. CD spectrum of heilaohulignan C (3)

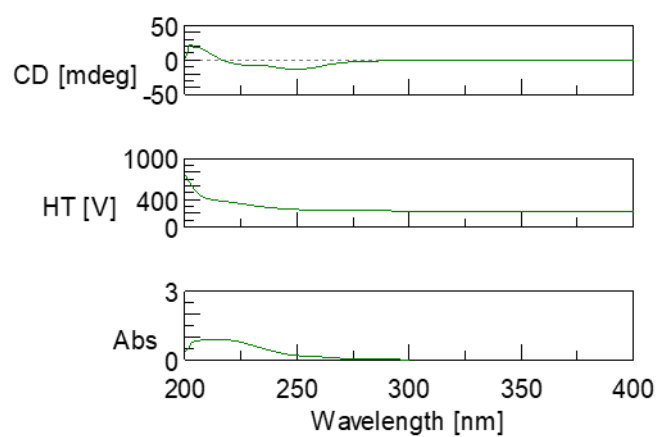

Supplement: s1 [file s1]
